1 **Title:** ‘Sex change in the New Zealand spotty wrasse (*Notolabrus celidotus*), a  
2 temperate model species’

3

4 **Running title (40 characters max.):** Sex change in *Notolabrus celidotus*

5

6 Goikoetxea A<sup>1\*</sup>, Muncaster S<sup>2,3\*</sup>, Todd EV<sup>4</sup>, Lokman PM<sup>5</sup>, Robertson H<sup>2</sup>, Moraes  
7 C<sup>2</sup>, Damsteegt EL<sup>5</sup>, Gemmell NJ<sup>1</sup>.

8

9 \*These authors contributed equally to this article.

10

11 <sup>1</sup>Department of Anatomy, University of Otago, Dunedin, New Zealand

12 <sup>2</sup>Environmental Management Group, Toi Ohomai Institute of Technology,  
13 Tauranga, New Zealand

14 <sup>3</sup>School of Science, University of Waikato, Tauranga, New Zealand

15 <sup>4</sup>School of Life and Environmental Science, Deakin University, Geelong, Australia

16 <sup>5</sup>Department of Zoology, University of Otago, Dunedin, New Zealand

17

18 **Corresponding Author:**

19 Simon Muncaster

20 School of Science, University of Waikato

21 Private Bag 3105

22 Hamilton 3240, New Zealand

23 Email: [simon.muncaster@waikato.ac.nz](mailto:simon.muncaster@waikato.ac.nz)

24

25 **Key words (3 - 6):**

26 Sex change, wrasse, sex steroid, seasonality, aromatase

27

28 **Summary statement (15 - 30 words):**

29 **Abstract**

30

31 Many studies of vertebrate sex change focus on subtropical and tropical  
32 teleosts. This study presents the protogynous New Zealand spotty wrasse,  
33 *Notolabrus celidotus*, as a temperate model. Captive fish were induced to  
34 change sex using either aromatase inhibition or manipulation of social  
35 groups. The endocrine and genetic cascade underlying this process was  
36 investigated using time-series sampling coupled with histological staging,  
37 sex steroid quantification and nanoString nCounter mRNA analysis.  
38 Seasonality affected sex ratios and sex steroid profiles; the likelihood of sex  
39 change increased when social manipulations were performed outside of the  
40 breeding season. Early-stage decreases in plasma 17 $\beta$ -estradiol (E2)  
41 concentrations or gonadal aromatase (*cyp19a1a*) expression were not  
42 detected in spotty wrasse, despite these being associated with the onset of  
43 sex change in many protogynous hermaphrodites. Gonadal expression of 21  
44 candidate genes was examined in relation to gonadal histology and sex  
45 steroid concentrations across sex change. When compared to other species,  
46 some genes previously implicated in sex determination and differentiation  
47 showed typical sex-specific gonadal expression patterns (*foxl1*, *dmrt1*, *amh*),  
48 while other critical male- and female-pathway genes exhibited unexpected  
49 patterns (*cyp19a1a*, *rspo1*, *sox9a*). Moreover, expression of the masculinising  
50 factor *amh* (anti-Müllerian hormone) increased during early sex change,  
51 implying a potential role as a proximate trigger for sex change. Dynamic  
52 expression of DNA methyltransferase genes suggested a key role of  
53 epigenetic regulation during the ovary-to-testis transformation in this  
54 species. Collectively, these data provide a foundation for the spotty wrasse as  
55 a new teleost model to study sex change and cell fate in vertebrates.

56

## 57 Introduction

58

59 For most vertebrates, sex is genetically determined and remains constant  
60 throughout life. However, in reptiles and teleost fishes sexual state is often  
61 plastic. The direction and process of sex change differs greatly between  
62 species and taxa. Social environment and community structure tend to  
63 regulate sequential sex change, which is unique to teleosts (Reavis & Grober,  
64 1999; Solomon-Lane et al. 2013; Sprenger et al., 2012). The fact that  
65 laboratory manipulation of social structure may induce natural sex change  
66 makes them convenient models to understand the mechanistic drivers of this  
67 transformation. These fish present *in vivo* opportunities to examine cell fate  
68 pathways, brain plasticity, and epigenetic regulation of life-history trajectory  
69 and reproductive status.

70

71 Current sex change research mostly focuses on tropical and warm-acclimated  
72 models within the Labridae (Godwin et al., 1996; Kojima et al., 2008; Lamm  
73 et al., 2015; Liu et al., 2017; Nakamura et al., 1989; Nozu et al., 2009; Ohta  
74 et al., 2003), Serranidae (Alam et al., 2008; Bhandari et al., 2003; Bhandari  
75 et al., 2005; Li et al. 2007; Chen et al. 2020) and Gobiidae (Kroon & Liley,  
76 2000; Kroon et al. 2005; Maxfield & Cole, 2019). The influence of elevated  
77 water temperature and compressed light cues tends to elicit rapid sex change  
78 and extended reproductive phases in these species. In contrast, few studies  
79 focus on temperate sex changing fish that experience strong reproductive  
80 seasonality and a protracted period of sex change. These species, arguably,  
81 offer an extended window of graded change in which to tease out fine-scale  
82 modulation of physiological drivers.

83

84 The New Zealand (NZ) spotty wrasse, *Notolabrus celidotus*, is an endemic  
85 protogynous, temperate zone (35° – 47° S) labrid that is well suited to  
86 laboratory studies. These small (< 26 cm) fish are abundant and easily caught  
87 on shallow reefs and in harbours around the NZ coastline. They have  
88 dimorphic initial phase (IP) and terminal phase (TP) colour morphs,

89 characteristic of most wrasses (Choat, 1965; Jones, 1980). However, two male  
90 sexual strategies exist with IP sneaker males displaying female mimicry and  
91 behaviourally dominant TP males establishing defended breeding territories  
92 (Figure 1). Reproduction peaks in the austral spring but the exact length is  
93 likely to vary with latitude (Jones, 1980). The fish are physically hardy with  
94 a wide thermal tolerance (approximately 8° C – 25° C), they adapt well to  
95 captivity and tolerate experimental manipulation. Sexually mature fish will  
96 spawn in captivity and sex change is induced in IP fish through the  
97 manipulation of social structure. This proclivity to complete natural sex  
98 change under laboratory conditions is of particular significance as this is not  
99 possible with other model species such as the bluehead wrasse. Collectively,  
100 these attributes make spotty wrasse a convenient biological model to study  
101 sex change.

102

103 Sex change is effected through the reproductive axis, yet the underlying  
104 regulatory mechanisms are not well understood. The feminising and  
105 masculinising effects of the sex steroids, 17 $\beta$ -estradiol (E2) and 11-  
106 ketotestosterone (11KT) on sex changing fish are clear (Frisch, 2004; Kroon  
107 and Liley, 2000; Todd et al., 2016). However, the molecular interplay  
108 modulating their balance is complicated. Recent studies indicate that cross-  
109 talk between the hypothalamic-pituitary-interrenal (HPI) and the  
110 hypothalamic-pituitary-gonadal (HPG) axes exists which suggests an  
111 influential role of stress in sex change (Liu et al., 2017; Todd et al., 2019).  
112 Furthermore, a suite of candidate genes involved in critical female (e.g.  
113 *cyp19a1a*, *foxl2a* and *ctnnb1*) and male (e.g. *amh*, *dmrt1* and *sox9a*)  
114 developmental pathways have also been implicated as having a regulatory  
115 role in sex change. The identification of an early molecular event acting as a  
116 key trigger of sex change is of special interest. Of these genes, *cyp19a1a*, the  
117 gonadal aromatase enzyme responsible for the bioconversion of testosterone  
118 into E2, is a strong candidate. An early decrease in E2 concentration has been  
119 associated with the onset of sex change in several protogynous species  
120 (Bhandari et al., 2003; Liu et al., 2017; Muncaster et al., 2013; Nakamura et

121 al., 1989). This is further supported by manipulative experiments to  
122 chemically inhibit the aromatase enzyme (Higa et al., 2003; Kroon et al.,  
123 2005; Lee et al., 2001; Nakamura et al., 2015; Nozu et al., 2009). With a  
124 network of candidate genes likely to influence (albeit indirectly) the gonadal  
125 sex steroid environment, a targeted approach to study their expression across  
126 sex change is warranted.

127

128 In this study, we present histological, endocrine and gene expression data to  
129 describe spotty wrasse as a new temperate-water model for the study of  
130 vertebrate sex change. We investigate molecular and endocrine pathways as  
131 well as potential triggers that may regulate gonadal restructure in these fish  
132 using both chemical and socially induced sex change.

133

## 134 **Methods**

135

### 136 **Experimental set-up**

137

138 *Experiment 1: Induction of sex change in spotty wrasses by aromatase*  
139 *inhibition (AI2014)*

140

141 In this experiment, the aromatase inhibitor (AI) fadrozole (C<sub>14</sub>H<sub>13</sub>N<sub>3</sub>) was  
142 used to induce sex change in captive IP spotty wrasse individuals between  
143 August and September 2014. Fish were captured around high tide by hook  
144 and line off the coast of Tauranga, Bay of Plenty, New Zealand (37.6878° S,  
145 176.1651° E) and subsequently maintained at the Aquaculture Centre at Toi  
146 Ohomai Institute of Technology, Tauranga. TP males were distinguished  
147 from IP males and females by external observation: IP fish have a large inky  
148 thumbprint spot in the middle of the body, whereas TP males have an  
149 irregularly shaped row of blackish spots and light electric blue wavy patterns  
150 on their cheeks (Choat, 1965). Thirty IP fish ranging from 154 – 229 mm total  
151 length (TL) were distributed across three 400-litre recirculating seawater  
152 systems under a natural photoperiod. Natural sex change was blocked by

153 placing a TP male in each tank, creating a socially inhibitory environment.  
154 During the experiment, fish were fed frozen greenshell mussels (*Perna*  
155 *canaliculus*) three times per week. Pellets containing 200 µg fadrozole  
156 (Sigma-Aldrich) in a matrix of cholesterol:cellulose = 95:5 were made in-  
157 house (as described in (Lokman et al., 2015; Sherwood et al., 1988)). The  
158 release rate of fadrozole from these pellets was not tested. Sham pellets  
159 (vehicle) contained matrix only. Following an acclimation period of three  
160 weeks, on day 0 of the experiment all IP individuals were given a single  
161 intramuscular fadrozole implant (n=16) or a sham implant without hormone  
162 (n=14) using a Ralgun implanter (Syndel, Ferndale, WA).

163

164 All fish were removed from individual tanks on day 21 (Tank 1, n=11), day  
165 39 (Tank 2, n=11) or day 60 (Tank 3, n=11; end of experiment). Fish were  
166 anaesthetised in an aerated bath containing 600 ppm 2-phenoxyethanol  
167 (Sigma-Aldrich) and blood samples were collected from the caudal vein using  
168 a 1 mL heparinised syringe. Fish were then euthanised by rapid decapitation.  
169 The mid-section of one gonad was fixed in Bouin's solution (TP males) or 10%  
170 neutral buffered formalin (IP individuals) overnight, and then stored in 70%  
171 EtOH at room temperature until paraffin embedding for histological  
172 analysis. The same location in the gonads was used in all fish when fixing  
173 gonadal samples for histology. Body weight and length, and gonadal weight  
174 were measured for each fish.

175

176 *Experiment 2: Social induction of sex change in spotty wrasses within their*  
177 *breeding season (SI2016)*

178

179 Sex change was induced in captive spotty wrasses through manipulation of  
180 social groups (i.e. removal of males from the treatment tanks) between  
181 September and December 2016. Fifty IP and ten TP individuals ranging from  
182 150 – 215 mm TL were captured and maintained as described in Experiment  
183 1 (AI2014). Fish were distributed into groups across ten 400-litre  
184 recirculating seawater systems such that each tank contained a hierarchy of

185 different sized IP fish and a single TP male (215 – 244 mm TL). After a 3-  
186 week acclimation, TP males were removed from the treatment tanks.  
187 Subsequently, the largest IP fish from each tank was terminally sampled on  
188 days 0, 30, 50, 60, 65, or 66 (end of experiment). Blood plasma collection,  
189 anaesthetic administration, tissue dissection and recording of morphometrics  
190 were conducted as described for AI2014.

191

192 *Experiment 3: Social induction of sex change in spotty wrasses outside their*  
193 *breeding season (SI2018)*

194

195 Social manipulation was used to induce sex change in captive spotty wrasses  
196 outside the breeding season between January and April 2018. Sixty five IP  
197 and twelve TP individuals ranging from 138 – 218 mm TL were captured and  
198 maintained as described in AI2014. Fish were distributed across twelve 400-  
199 litre recirculating seawater systems such that each tank contained a  
200 hierarchy of 4-5 different-sized IP fish and a single TP male (194 – 220 mm  
201 TL). Three control (5 IP females + 1 TP) tanks were maintained and nine  
202 manipulated (5 IP females - 1 TP) tanks had the males removed on day 0  
203 after a 2-week acclimation period. A further five IP females were terminally  
204 sampled on day 0 to provide a baseline indication of reproductive status. Fish  
205 were sampled over a time series as follows: day1 (n=5), day 11 (n=5), day 26  
206 (n=10), day 36 (n=10), day 55 (n=10), day 92 (n=9). Eleven mortalities  
207 occurred during the experiment.

208

209 Anaesthetic administration, blood plasma collection, and recording of  
210 morphometrics were conducted as described for AI2014. One gonad was flash  
211 frozen in ice-cold (on dry ice) isopentane (C<sub>5</sub>H<sub>12</sub>) (Sigma-Aldrich) and stored  
212 at -80 °C for RNA analyses. The second gonad was preserved for histological  
213 analysis as described in AI2014. Fish in all three experiments were  
214 maintained and manipulated in accordance with New Zealand National  
215 Animal Ethics Advisory Committee guidelines (approved by the Animal  
216 Ethics Committee of Toi Ohomai Institute of Technology).

217

## 218 Gonadal tissue processing for histology

219

220 Histological analysis of gonadal tissues was used to characterise cellular  
221 changes occurring across sex change. Tissues from AI2014 and SI2016, fixed  
222 in Bouin's solution (TP males) or 10% neutral buffered formalin (IP  
223 individuals), were processed for routine embedding in paraffin (New Zealand  
224 Veterinary Pathology, Hamilton Laboratory, New Zealand). SI2018 gonadal  
225 tissues were embedded in paraffin (Otago Histology Services Unit,  
226 Department of Pathology, Dunedin School of Medicine, University of Otago,  
227 New Zealand). Sections were cut at 3  $\mu$ m and stained with Mayer's  
228 haematoxylin and eosin.

229

230 Gonadal sections were examined under light microscope to confirm the sex of  
231 each individual and samples were subsequently classified into sex-change  
232 stages as outlined in Table 1 (modified from (Thomas et al., 2019)). As spotty  
233 wrasses are seasonal breeders, females were classified as either non-breeding  
234 females (NBF) or breeding females (BF), depending on the presence of  
235 maturing oocytes. Transitioning individuals were classified as being in an  
236 early (ET), mid (MT) or late (LT) stage of transition.

237

238 Table 1. Histological stages of gonadal sex change in New Zealand spotty  
239 wrasse.

| Stage                               | Abbreviation | Characteristics                                                                                                                                      |
|-------------------------------------|--------------|------------------------------------------------------------------------------------------------------------------------------------------------------|
| <b>Non-Breeding Female</b>          | NBF          | Ovary with predominantly healthy previtellogenic oocytes. Clearly atretic later-stage oocytes may also be present                                    |
| <b>Breeding/Recrudescent Female</b> | BF           | Presence of healthy previtellogenic and vitellogenic oocytes. May also include hydrating oocytes                                                     |
| <b>Early Transitioning</b>          | ET           | Atretic oocytes of all stages, including previtellogenic oocytes, common. Nests of gonial cells, yellow-brown bodies and stromal cells often evident |
| <b>Mid-Transitioning</b>            | MT           | Spermatogenic cysts containing mainly spermatogonia or spermatocytes evident.                                                                        |



| Stage                      | Abbreviation | Characteristics                                                                                                                                                                                                                                                                                  |
|----------------------------|--------------|--------------------------------------------------------------------------------------------------------------------------------------------------------------------------------------------------------------------------------------------------------------------------------------------------|
| <b>Late Transitioning</b>  | LT           | Many atretic oocytes often still present. Stromal cells and cellular debris common<br>Evidence of lobular structure forming. Male germ cells dominate. Yellow-brown bodies and cellular debris common                                                                                            |
| <b>Terminal Phase Male</b> | TP           | Fully structured testis with spermatogenic cysts arranged into lobules. Sperm ducts developed peripherally inside the tunica albuginea and presence of central remnant lumen. All stages of spermatogenic germ cells may be present depending on season. A few degenerating oocytes may persist. |
| <b>Initial Phase Male</b>  | IP           | Presence of lobule formation containing spermatogenic cysts. No evidence of degenerating oocytes. No central lumen and sperm ducts tend to be aggregated centrally                                                                                                                               |

240

#### 241 **Steroid measurements**

242

243 Blood was centrifuged at 13,500 rpm for 3 minutes to obtain plasma, which  
244 was stored at -20 °C until steroid analysis. Measurement of blood plasma  
245 concentrations of E2 and 11KT across sex change were conducted by  
246 radioimmunoassay (RIA) after routine steroid extraction following  
247 procedures described in (Kagawa et al., 1981; Kagawa et al., 1982; Young et  
248 al., 1983). Assays were validated for spotty wrasse plasma, serially diluted  
249 plasma behaving in a manner similar to the standard curve (parallel  
250 displacement). Tritiated 11KT was synthesised using the methodology  
251 described in (Lokman et al., 1997), whereas label for the E2 assay was  
252 acquired from Perkin Elmer. Antiserum against E2 was purchased from  
253 MyBioSource and antiserum against 11KT was kindly donated by Professor  
254 Yoshitaka Nagahama, Emeritus Professor, National Institute for Basic  
255 Biology, Okazaki, Japan. After incubation and separation of antibody-bound  
256 and -unbound steroid by charcoal-dextran solution (0.5% dextran/charcoal),  
257 tubes were centrifuged (15 min, 2000g), the supernatant was decanted, and  
258 radioactivity measured using a MicroBeta<sup>®</sup> Trilux scintillation counter  
259 (Wallac 1450, Perkin Elmer). Samples from each experiment were run in

260 separate assays with a minimum detectable level of 40 pg/tube (0.08 ng/mL)  
261 (E2) and 50 pg/tube (0.10 ng/mL) (11KT) for AI2014, 35 pg/tube (0.07 ng/mL)  
262 (E2) and 120 pg/tube (0.24 ng/mL) (11KT) for SI2016, and 50 pg/tube (0.10  
263 ng/mL) (E2) and 70 pg/tube (0.14 ng/mL) (11KT) for SI2018. Extraction  
264 efficiencies were 46% (E2) and 82% (11KT) for AI2014; 61% (E2) and 87%  
265 (11KT) for SI2016; and 69% (E2) and 40% (11KT) for SI2018.

266

267 Due to non-normality of the RIA data, the non-parametric Kruskal-Wallis  
268 test (Kruskal and Wallis, 1952) was used to compare plasma steroid  
269 concentrations between sexual stages, for E2 or 11KT separately. If stage  
270 was found to have a significant effect, *post hoc* comparisons using Dunn's  
271 tests (Dunn, 1961) with Benjamini Hochberg correction for multiple  
272 comparisons (Benjamini and Hochberg, 1995) were performed between  
273 stages to determine where the significance lay, carried out in R (v. 1.1.453)  
274 (Core Team, 2013).

275

#### 276 **RNA extraction from gonadal tissues**

277

278 Gonadal samples were homogenised using a power homogeniser before RNA  
279 extraction. For AI2014 and SI2016 samples, RNA was extracted with  
280 TRIzol™ (Thermo Fisher Scientific) using chloroform as the phase  
281 separation reagent, before DNase-treatment (TURBO DNA-free Kit, Thermo  
282 Fisher Scientific) and total RNA clean-up (RNA Clean & Concentrator, Zymo  
283 Research). For SI2018 samples, RNA was extracted with Direct-zol RNA  
284 MiniPrep Plus (Zymo Research) without phase separation (on column DNase  
285 treatment).

286

287 RNA concentration was measured using a Qubit 2.0 Fluorometer (Life  
288 Technologies) and RNA integrity was evaluated on a Fragment Analyzer  
289 (Advanced Analytical Technologies Inc.). The RNA profiles of sex-changing  
290 gonads presented a strong peak of low molecular weight RNA. This is  
291 considered to be a result of massive 5S rRNA amplification in ovaries (Liu,

292 2016), and masks the 18S and 28S rRNA peaks used to calculate the RNA  
293 Integrity Number (RIN) values, making them unreliable estimates of RNA  
294 integrity. Similar patterns have been observed in ovaries and/or intersex  
295 gonads of thicklip gray mullet (*Chelon labrosus* (Diaz de Cerio et al., 2012)),  
296 sharsnout seabream (*Diplodus puntazzo* (Manousaki et al., 2014)) and  
297 bluehead wrasse (Liu, 2016). Therefore, in spotty wrasses, RNA integrity for  
298 such samples was confirmed by visual inspection of 18S and 28S rRNA peaks.  
299

### 300 **Gene expression analysis with nanoString nCounter™ technology**

301

302 A probe array of 24 candidate genes was designed for spotty wrasse (Table  
303 2). Spotty wrasse-specific transcript sequences were identified from a draft  
304 spotty wrasse transcriptome assembly (EV Todd & NJ Gemmell, 2015,  
305 unpublished data) available in the Gemmell lab, Anatomy Department,  
306 University of Otago, New Zealand, using sequence similarity searches.  
307 Reference transcripts from zebrafish (*Danio rerio*) were downloaded from  
308 GenBank or Ensembl for each target gene, and *actb1*, *eef1a1a* and *g6pd* as  
309 potential housekeeping genes. Downloaded transcripts were then used to  
310 identify the corresponding spotty wrasse sequences from the transcriptome  
311 via local BLASTn and tBLASTx (translated the query nucleotide sequences,  
312 and the spotty wrasse transcriptome into deduced amino acid sequences in  
313 all six possible frames, which were then compared by local alignment). The  
314 best matching spotty wrasse contig was chosen and its identity confirmed  
315 using online nucleotide BLAST (BLASTn) against the NCBI database  
316 (<http://www.ncbi.nlm.nih.gov/>).

317

318 These sequences were submitted to nanoString Technologies for probe  
319 design, and nanoString nCounter™ CodeSet gene expression quantification  
320 was delivered by the Otago Genomics Facility, Biochemistry Department,  
321 University of Otago, New Zealand. Gonadal RNA (100 ng) from 5 control  
322 females sampled on day 0 of the SI2018 experiment (CF), 19 ET, 9 MT, 9 LT  
323 and 5 TP also from SI2018 was used to perform gene expression profiling.

324

325 Two approaches, RefFinder ([https://www.heartcure.com.au/reffinder/?type=](https://www.heartcure.com.au/reffinder/?type=reference)  
326 [reference](https://www.heartcure.com.au/reffinder/?type=reference)) (Xie et al., 2012) and BestKeeper ([https://www.gene-quantification](https://www.gene-quantification.de/bestkeeper.html)  
327 [.de/bestkeeper.html](https://www.gene-quantification.de/bestkeeper.html)) (Pfaffl et al., 2004) were used to determine the stability  
328 of gene expression of the potential housekeeping genes (*g6pd*, *eef1a1a* and  
329 *actb1*) and their suitability as reference genes for the normalisation of  
330 nanoString results. However, neither RefFinder or BestKeeper considers  
331 potential differences in reference gene expression between experimental  
332 groups, which can confound results and lead to an inaccurate interpretation  
333 (Dheda et al., 2004; Setiawan and Lokman, 2010). Therefore, candidate  
334 reference genes were also evaluated for differences in target molecule counts  
335 between sex-change stages. Due to non-normality of the raw nanoString  
336 data, the non-parametric Kruskal-Wallis test (Kruskal and Wallis, 1952) was  
337 used on the *actb1*, *eef1a1a* and *g6pd* counts, as well as the geometric mean  
338 of all possible combinations of these three genes, to determine whether stage  
339 had a significant effect on expression levels of each candidate housekeeping  
340 gene.

341

342 Table 2. Genes analysed in spotty wrasse gonad using the nanoString nCounter™ CodeSet technology. Abbreviations: high  
 343 mobility group (HMG), murine-mammary-tumour virus (MMTV), sex-determining region-Y (SRY).

| Gene symbol                                         | Gene description                                      | Contig ID    | Reference transcript ID |
|-----------------------------------------------------|-------------------------------------------------------|--------------|-------------------------|
| <b>Housekeeping genes</b>                           |                                                       |              |                         |
| <i>actb1</i>                                        | $\beta$ -actin, cytoplasmic 1                         | c58053_g1_i1 | NM_131031.1             |
| <i>eef1a1a</i>                                      | eukaryotic translation elongation factor 1 alpha 1a   | c58053_g1_i1 | NM_200009.2             |
| <i>g6pd</i>                                         | glucose-6-phosphate dehydrogenase                     | c39960_g1_i1 | ENSDART00000104834.6    |
| <b>Steroidogenic enzymes and hormone receptors</b>  |                                                       |              |                         |
| <i>cyp19a1a</i>                                     | aromatase a (gonad isoform)                           | c52027_g1_i1 | NM_131154.3             |
| <i>cyp11c1/b2</i>                                   | steroid 11 $\beta$ -hydroxylase                       | c62027_g1_i1 | NM_001080204.1          |
| <i>hsd11b2</i>                                      | 11 $\beta$ -hydroxysteroid dehydrogenase type 2       | c67035_g1_i1 | NM_212720.2             |
| <i>nr3c1</i>                                        | glucocorticoid receptor                               | c36910_g2_i1 | NM_001020711.3          |
| <i>nr3c2</i>                                        | mineralocorticoid receptor                            | c49976_g1_i2 | NM_001100403.1          |
| <b>Key sex-related transcription factors</b>        |                                                       |              |                         |
| <i>foxl2a</i>                                       | forkhead box L2a                                      | c53356_g1_i1 | NM_001045252.2          |
| <i>dmrt1</i>                                        | doublesex and mab-3 related transcription factor 1    | c66498_g1_i1 | NM_205628.2             |
| <i>amh</i>                                          | anti-Müllerian hormone                                | c51546_g1_i1 | NM_001007779.1          |
| <i>sox9a</i>                                        | SRY-related HMG box 9a                                | c53707_g2_i1 | NM_131643.1             |
| <i>sox8b</i>                                        | SRY-related HMG box 8b                                | c60549_g2_i1 | NM_001025465.1          |
| <b>Rspo1/Wnt/<math>\beta</math>-catenin pathway</b> |                                                       |              |                         |
| <i>wnt4a</i>                                        | wingless type MMTV integration site family, member 4a | c52640_g1_i1 | NM_001040387.1          |
| <i>ctnnb1</i>                                       | catenin (cadherin-associated protein), beta 1         | c47984_g1_i2 | NM_131059.2             |
| <i>wnt4b</i>                                        | wingless type MMTV integration site family, member 4b | c60281_g1_i1 | NM_131500.1             |

| Gene symbol                   | Gene description                            | Contig ID    | Reference transcript ID |
|-------------------------------|---------------------------------------------|--------------|-------------------------|
| <i>rspo1</i>                  | R-spondin-1 (precursor)                     | c50451_g1_i2 | NM_001002352.1          |
| E3 ubiquitin-protein ligase   |                                             |              |                         |
| <i>znrf3</i>                  | zinc and ring finger 3                      | c68386_g1_i1 | NM_001308555.1          |
| <i>fancl</i>                  | Fanconi anaemia complementation group L     | c63372_g2_i1 | NM_212982.1             |
| Epigenetic regulatory factors |                                             |              |                         |
| <i>dnmt1</i>                  | DNA methyltransferase 1                     | c43163_g1_i1 | NM_131189.2             |
| <i>dnmt3aa</i>                | DNA methyltransferase 3aa                   | c59097_g4_i2 | NM_001018134.1          |
| Jumonji gene family           |                                             |              |                         |
| <i>jarid2b</i>                | jumonji, AT rich interactive domain 2b      | c67175_g1_i2 | NM_001202459.1          |
| <i>kdm6bb</i>                 | lysine (K)-specific demethylase 6B, b       | c52506_g1_i1 | NM_001030178.2          |
| Pluripotency factor           |                                             |              |                         |
| <i>pou5f3</i>                 | POU domain, class 5, transcription factor 1 | c63041_g1_i1 | NM_131112.1             |

345 The geometric mean of gene pair *actb1|g6pd* was selected as the reference gene  
346 for data normalisation (see Results). Normalisation calculations were performed  
347 automatically in the nanoString nSolver Analysis software (version 4.0), and  
348 normalised data were log base-2 transformed prior to analysis. Due to non-  
349 normality of the normalised nanoString data, the non-parametric Kruskal-Wallis  
350 test (Kruskal and Wallis, 1952) was run separately for each target gene to  
351 determine whether stage had a significant effect on gene expression level, and *post*  
352 *hoc* comparisons using Dunn's tests (Dunn, 1961) with Benjamini Hochberg  
353 correction for multiple comparisons (Benjamini and Hochberg, 1995) were  
354 performed to determine where the significance, if any, lay between stages. All  
355 analyses were performed in R (v. 3.3.2) (Core Team, 2013). NanoString Expression  
356 Data Analysis Guidelines (MAN-C0011-04) were followed to determine an  
357 expression threshold, set as the log<sub>2</sub> of the geometric mean of the negative control  
358 counts plus two standard deviations.

359

360 In addition, Principal Component Analysis (PCA) (scaled) was used to visualise  
361 overall mRNA expression variation among samples considering all genes, within  
362 and across sex-change stages in R (v. 1.1.453) (Core Team, 2013). To identify the  
363 genes contributing most to observed patterns represented by the first two  
364 principal components, component loadings (defined as eigenvectors scaled by the  
365 square root of the respective eigenvalues) were represented as coordinates in a  
366 Cartesian plane.

367

## 368 **Results and Discussion**

369

### 370 **Histological analysis of gonadal sex change**

371

372 *Experiment 1: Induction of sex change in spotty wrasses by aromatase inhibition*  
373 *(AI2014)*

374

375 Aromatase inhibition successfully induced sex change in 93% of the surviving (2  
376 mortalities) captive female spotty wrasses held under socially inhibitory

377 conditions. Histological analysis confirmed that among the AI-implanted females,  
378 12 fish reached ET stage (day 21, n=2; day 39, n=5; day 60 n=5), and one reached  
379 LT stage (day 60). A single fadrozole-implanted fish remained female. In contrast,  
380 none of the control females showed signs of ovarian atresia or sex change. None of  
381 the fish examined were IP males.

382

383 *Experiment 2: Social induction of sex change in spotty wrasses within their*  
384 *breeding season (SI2016)*

385

386 The manipulation of social groups, through male removal, successfully promoted  
387 sex change (81%) in female spotty wrasses during the 2016 breeding season.  
388 Histology confirmed that among the socially manipulated females, 15 fish reached  
389 ET stage (day 30, n=2; day 50, n=3; day 60, n=4; day 65, n=3; day 66, n=3), one  
390 reached MT stage (day 50), one LT stage (day 50), and one was found to be a fully  
391 TP male (day 60). Four of the socially manipulated fish remained female (day 30,  
392 n=2; day 66, n=2). Ovarian atresia was evident in four of the control females (day  
393 30, n=3; day 66, n=1). However, it was impossible to elucidate whether this was  
394 indicative of early sex change or gonadal resorption following the breeding season  
395 (Thomas et al., 2019). Histological analysis also confirmed that five of the initial  
396 50 IP individuals captured were IP males (10.0% frequency), a slightly higher ratio  
397 than reported in the wild (4.1 – 5.7%) (Jones, 1980).

398

399 *Experiment 3: Social induction of sex change in spotty wrasses outside their*  
400 *breeding season (SI2018)*

401

402 Male removal conducted outside the breeding season also induced sex change in  
403 female spotty wrasses. All socially manipulated females showed histological signs  
404 of ovarian degeneration or sex change. Histology confirmed that 18 females  
405 reached ET stage (day 1, n=3; day 11, n=2; day 26, n=3; day 36, n=3; day 55, n=4;  
406 day 96, n=3), 12 MT stage (day 1, n=1; day 11, n=3; day 26, n=4; day 36, n=1; day  
407 55, n=3), 13 LT stage (day 26, n=2; day 36, n=6; day 55, n=3; day 92, n=2) and 6  
408 became full TP males (day 1, n=1; day 92, n=5). No IP males were found (Figure



409 2). Unfortunately control tanks with male fish present experienced poor health  
410 and reduced survival. This confounded the efficacy of socially induced sex change  
411 in this experiment. Nonetheless, the results of the other two experiments (AI2014  
412 & SI2016) indicate that both chemical and social manipulation increases sex  
413 change compared to control female fish that have a male present (Fisher's exact  
414 test,  $p < 0.001$ ). This is also supported by previous studies with this species  
415 (Muncaster, unpublished data).

416

### 417 **Incidence of sex change depending on seasonality**

418

419 The breeding season of spotty wrasses in northern New Zealand lasts from late  
420 July until the end of November and peaks in the austral spring (Jones, 1980). Of  
421 the socially manipulated spotty wrasses, the greatest number of mid-transitional  
422 and fully transformed males occurred during the post-spawning period (SI2018)  
423 in summer and early autumn (January to April; Figure 3). A total of 55% of these  
424 fish had MT through to TP stage gonads. In contrast, less than 25% of the fish  
425 socially manipulated during the October-December breeding season (SI2016)  
426 presented the same stage gonads. Sex change is often seasonally biased with the  
427 greatest occurrence following the breeding season in temperate and warm water  
428 species, but it may occur all year-round in some tropical species (Alonso-  
429 Fernández et al., 2011; Li et al., 2007; Muncaster et al., 2013; Sadovy and Shapiro,  
430 1987; Thomas et al., 2019). Our results support observations in wild spotty  
431 wrasses, in which natural sex change has been documented during the non-  
432 reproductive months between November and May (Jones, 1980). This indicates  
433 that for experimental purposes, post-spawned fish present the best candidates for  
434 socially manipulated sex change. However, we have also demonstrated that male  
435 removal can lead to sex change within the breeding season.

436

### 437 **Hormonal profile analysis**

438

439 Plasma E2 concentrations showed a general decreasing trend from female to male  
440 stages (Figure 4A). Fish treated with an aromatase inhibitor (AI2014) had mean

441 plasma E2 concentrations ranging from 0.08 ng/ml to  $0.34 \pm 0.25$  SD ng/ml for LT  
442 and ET stages respectively. In comparison, non-manipulated control fish had a  
443 lower mean plasma E2 concentration of  $0.45 \pm 0.46$  SD ng/ml, although this was  
444 not statistically different. Social manipulation during the breeding season  
445 (SI2016) showed significantly higher plasma E2 concentrations in control females  
446 (CF) ( $0.39 \pm 0.40$  SD ng/mL) compared to TP ( $0.07 \pm 0.00$  SD ng/mL,  $p < 0.001$ ) and  
447 IP males ( $0.07 \pm 0.00$  SD ng/mL,  $p < 0.05$ ). However, when social manipulation  
448 was conducted after the spawning season (SI2018), plasma E2 concentrations  
449 were minimal in all fish with no significant differences between sexual stages.  
450 Similar patterns of reduced E2 concentrations immediately after the breeding  
451 season have been observed in other protogynous species (Bhandari et al., 2003; Li  
452 et al., 2007; Muncaster et al., 2010). This is not surprising considering the  
453 importance of E2 in driving seasonal oocyte growth in teleosts (Jalabert, 2005;  
454 Lubzens et al., 2010; Nagahama, 1994; Patiño and Sullivan, 2002). After  
455 reproduction and the conclusion of active oogenesis, temperate fish often enter a  
456 period of gonadal resorption and quiescence characterised by ovarian atresia and  
457 reduced sex steroid concentrations (Scott et al., 1984).

458

459 While E2 has a clear role in maintaining ovarian function, there is no obvious  
460 relationship between plasma E2 concentrations and the initiation of sex change in  
461 spotty wrasses. A marked decrease in E2 concentrations has been implicated as a  
462 critical initiator of sex change in many protogynous species (Bhandari et al., 2003;  
463 Liu et al., 2017; Muncaster et al., 2013; Nakamura et al., 1989). Yet, despite a 2.4-  
464 fold decrease, there was no significant difference in plasma E2 concentration  
465 between CF and ET ( $0.16 \pm 0.16$  SD ng/mL) fish during the breeding season  
466 (SI2016). Similarly, there was no significant decrease of plasma E2 concentration  
467 between female and early transitional spotty wrasses from the other experiments  
468 (AI2014 & SI2018). While this may, in part, relate to sample size or seasonal  
469 influence, similar results were also reported in the bambooleaf wrasse (Ohta et  
470 al., 2008) and orange-spotted grouper (Chen et al., 2020). Undetectable E2  
471 concentrations existed from MT to male (TP & IP) stages in nearly all fish.  
472 Therefore, while there is no evidence of a minimum plasma E2 threshold required

473 to initiate gonadal transition in spotty wrasse, a general reduction is associated  
474 with the process of sex change in this species. Indeed, E2 depletion leads to  
475 masculinisation in hermaphroditic and gonochoristic species alike (Bhandari et  
476 al., 2004; Li et al., 2019; Nozu et al., 2009; Paul-Prasanth et al., 2013; Takatsu et  
477 al., 2013).

478  
479 Elevated plasma 11KT concentrations were observed in individual fish towards  
480 the transitional and male stages in all three experiments (AI2014, SI2016 and  
481 SI2018; Figure 4B). While variability in the data and reduced statistical power  
482 made the detection of discernible differences impossible, the timing of these  
483 observations coincides with the histological appearance of spermatogenic cysts  
484 (see Table 1). Increased 11KT concentrations were also evident from mid  
485 transition onwards in other protogynous species (Bhandari et al., 2003; Nakamura  
486 et al., 1989; Nakamura et al., 2005). Fish treated with AI (AI2014) had minimal  
487 11KT values in the earlier sexual stages. This was evident in a single BF (0.18  
488 ng/ml) and ET ( $0.22 \pm 0.17$  SD ng/ml) fish while a later stage LT individual  
489 presented with 1.00 ng/ml. In comparison, sham-treated CF had minimal plasma  
490 11KT concentrations ( $0.17 \pm 0.03$  SD ng/ml). Fish socially manipulated during the  
491 breeding season (SI2016) showed remarkably similar plasma 11KT concentrations  
492 regardless of sexual stage. These values ranged from  $0.13 \pm 0.02$  SD ng/ml in CF  
493 and BF to  $0.23 \pm 0.31$  SD ng/ml in TP. All of the transitional and IP fish had either  
494 identical mean or individual 11KT concentrations of 0.14 ng/ml. Many of the  
495 androgen concentrations of fish socially manipulated after the breeding season  
496 (SI2018) remained minimal as expected during quiescence. Minimum 11KT  
497 concentrations ( $0.13 \pm 0.02$  SD ng/ml) existed in CF and mean values were slightly  
498 higher in subsequent stages such as ET ( $0.15 \pm 0.03$  SD ng/ml) and MT fish ( $0.19$   
499  $\pm 0.15$  SD ng/ml). The greatest plasma 11KT values were in LT ( $0.29 \pm 0.32$  SD  
500 ng/ml) fish, while slightly reduced concentrations were recorded in TP individuals  
501 ( $0.22 \pm 0.18$  SD ng/ml). This disparity of androgen concentrations in late-stage fish  
502 most likely reflects the chronology of the experiment. TP fish were removed at the  
503 beginning of the experiment when spermatogenesis should be minimal or non-

504 existent. The occurrence of several LT fish coincided with seasonal gonadal  
505 recrudescence.

506 The androgen profiles from the fish in this study do not show a clear statistical  
507 relationship between sexual stages. However, the role of 11KT in driving  
508 spermatogenesis is well established in teleosts (Miura et al., 1991; Nagahama,  
509 1994; Nakamura et al., 1989; Schulz et al., 2010). Much of this androgen activity  
510 is likely to be paracrine in nature with steroidogenic somatic cells stimulating local  
511 germ cells both directly and indirectly within the gonadal compartment (Schulz,  
512 1986). The additional role of 11KT in expressing seasonal male secondary sexual  
513 characteristics, such as morphometric and behavioural modifications, also exists  
514 (Borg, 1994; Semsar and Godwin, 2004). This likely requires elevated plasma  
515 concentrations for remote, effective target cell signalling and may in part explain  
516 substantial elevations of 11KT prior to breeding in many male teleosts. The  
517 absolute concentrations of androgen required to stimulate spermatogenesis are  
518 conceivably much lower. Furthermore, prior to these peak physiological  
519 concentrations the actual concentrations of 11KT within the gonad are likely to be  
520 higher than in the plasma. It is, therefore, possible that the absolute  
521 concentrations of 11KT required to initiate spermatogenesis during gonadal  
522 restructure are not reflected in the spotty wrasse plasma samples. This issue could  
523 be investigated using *in vitro* explant culture systems.

524

### 525 **Comparison of housekeeping gene stabilities**

526

527 The ranking of candidate reference genes by RefFinder,  $\Delta$  CT and NormFinder  
528 was *actb1* > *g6pd* > *eef1a1a*. The BestKeeper ranking was *g6pd* > *actb1* > *eef1a1a*,  
529 based on both SD and r (Tables S1A and S1B). These results suggest that *actb1*  
530 and *g6pd* should be used as reference genes for normalisation of the current  
531 nanoString data.

532

533 The gonadal mRNA levels of candidate reference genes *actb1* and *eef1a1a* were  
534 found to be significantly affected by sex-change stages using the non-parametric

535 Kruskal-Wallis test (*actb1*,  $X^2(4) = 23.94$ ,  $p < 0.001$ ; *eef1a1a*,  $X^2(4) = 29.53$ ,  $p <$   
536  $0.001$ ). The geometric mean of the mRNA levels of all three genes and that of gene  
537 pairs *actb1|eef1a1a* and *eef1a1a|g6pd* were also significantly influenced by stage  
538 (*actb1|eef1a1a|g6pd*,  $X^2(4) = 16.77$ ,  $p < 0.005$ ; *actb1|eef1a1a*,  $X^2(4) = 27.53$ ,  $p <$   
539  $0.001$ ; *eef1a1a|g6pd*,  $X^2(4) = 13.82$ ,  $p < 0.01$ ). Candidate reference gene *g6pd*  
540 mRNA levels ( $X^2(4) = 7.97$ ,  $p = 0.09$ ) and the geometric mean of gene combination  
541 *actb1|g6pd* mRNA levels were not significantly affected by stage; ( $X^2(4) = 9.03$ ,  $p$   
542  $= 0.06$ ) (Figure S1). Consequently, gene pair *actb1|g6pd* was selected to normalise  
543 the target gene expression data (i.e. highest p-value for a gene combination  
544 observed) (Figure S1E).

545

#### 546 **NanoString gene expression analysis**

547

548 Several genes (*wnt4a*, *wnt4b* and *sox8b*) were excluded from analysis as their  
549 expression was below the detection threshold. It remains unknown whether this  
550 reflects low biological expression in the spotty wrasse gonad, or if it is a  
551 consequence of probe design.

552

553 PCA clustering of samples based on the collective gene set revealed that gonadal  
554 samples strongly cluster by sexual stage (Figure 5). Samples were most strongly  
555 organised by sex-change stage and progressing from female to male (PC1, 50.7%  
556 variation explained). Secondly, gonadal transcriptomes were organised by  
557 developmental commitment (PC2, 19.4% variation explained), separating  
558 transitional gonads from those in a more advanced state of differentiation,  
559 representing fully differentiated ovaries of control females and testes of TP males.  
560 This discrete PCA clustering of the sexual stages provides validation of the  
561 histological staging criteria (Table 1).

562

563 The spotty wrasse data show a striking resemblance to transcriptome-wide data  
564 from transitioning bluehead wrasse gonads (Todd et al., 2019). This demonstrates  
565 the relevance of this suite of 18 genes to describe the genetic regulation of the  
566 female-to-male transition in spotty wrasse. However, some overlaps between

567 sexual stages are evident, in particular between ET and MT, and LT and TP  
568 males. This reinforces the concept of a continuous progression of gonadal  
569 restructure, rather than a transition punctuated by larger transformative changes  
570 (Muncaster et al., 2013; Todd et al., 2019).

571

572 *Sexual dimorphic expression of genes encoding steroidogenic enzymes and*  
573 *hormone receptors*

574

575 The temporal regulation of steroid hormones is essential for the coordination of  
576 sex differentiation, sexual maturation and behaviour in vertebrates. They are also  
577 potent mediators of gonadal sex change in teleosts (Guiguen et al., 2010; Higa et  
578 al., 2003; Nakamura et al., 1989). As expected *cyp19a1a* expression was greatest  
579 in CF and was gradually downregulated across sex change (Figure 6A). Expression  
580 did not differ significantly in these stages and there was no evidence of an early,  
581 rapid downregulation that has been thought to trigger sex change in other species  
582 (Gemmell et al., 2019; Liu et al., 2017; Todd et al., 2016). Levels of *cyp19a1a*  
583 expression remained similar across ET, MT and LT stages (2018) while in  
584 comparison, plasma E2 concentrations were negligible by mid transition in all  
585 three experiments (AI2014, SI2016 and SI2018). While *cyp19a1a* is an unlikely  
586 proximate trigger of sex change in spotty wrasse, a more distant connection exists  
587 nonetheless. This is evident in the number of fish that changed sex following  
588 aromatase inhibition (AI2014) as well as the occurrence of sex change in fish  
589 socially manipulated after the breeding season (SI2018) when plasma E2  
590 concentrations were minimal. Considering the potent feminising action of E2, a  
591 reduction of gonadal concentrations may act as a gateway to facilitate the  
592 progression of transition rather than acting as an early trigger. This action may  
593 be through the release of steroid induced suppression on male-pathway genes  
594 (Guiguen et al., 2010).

595

596 In teleosts, testosterone (T) can be converted into 11KT by 11 $\beta$ -hydroxylase  
597 (Cyp11c1) and 11 $\beta$ -hydroxysteroid dehydrogenase type 2 (Hsd11b2) (Frisch, 2004).  
598 Upregulation of *cyp11c1* was observed across sex change (Figure 6B), with

599 significantly ( $X^2(4) = 32.39, p < 0.001$ ) greater expression in TP spotty wrasses  
600 than CF (median 2.6-fold greater) and ET (median 2.1-fold greater) fish. Albeit  
601 less pronounced, *hsd11b2* expression increased in a similar pattern across sex  
602 change ( $X^2(4) = 32.13, p < 0.001$ ; Figure 6C). The simultaneous upregulation of  
603 both *cyp11c1* and *hsd11b2* from MT through to TP stages coincides with the  
604 presence of spermatogenic cysts in the gonad and likely reflects an increase in  
605 gonadal 11KT production. Since plasma 11KT concentrations were not greatly  
606 elevated at this time of year (see Figure 4B), these expression patterns may  
607 indicate either a subtle paracrine action of 11KT in the early testis or the as-yet  
608 untranslated proteins.

609

610 Both *cyp11c1* and *hsd11b2* are involved in the teleost stress response through the  
611 production of cortisol and its subsequent inactivation to cortisone, respectively  
612 (Arterbery et al., 2010; Goikoetxea et al., 2017). Cross talk between the interrenal  
613 and reproductive axes through the upregulation of these enzymes has been  
614 implicated as influencing masculinisation in teleosts (Goikoetxea, 2020; Liu et al.,  
615 2017). Genes encoding the glucocorticoid (*nr3c1*) and mineralocorticoid (*nr3c2*)  
616 receptors in the spotty wrasse gonad showed elevated expression in the LT to TP  
617 stages (*nr3c1*,  $X^2(4) = 28.40, p < 0.001$ ; *nr3c2*,  $X^2(4) = 13.02, p < 0.05$ ) (Figures 6D  
618 and 6E). This differs from bluehead wrasse in which opposing sex-specific  
619 expression patterns were observed for *nr3c1* (male-biased expression) and *nr3c2*  
620 (female-biased expression) (Liu et al., 2015; Todd et al., 2019). Early-stage  
621 expression of *cyp11c1*, *hsd11b2* and *nr3c2* was thought to indicate a role for  
622 cortisol in triggering sex change in bluehead wrasse (Todd et al., 2019).  
623 Upregulation of these genes in spotty wrasse, occurred in later stage gonads  
624 showing no clear link for cortisol in the initiation of sex change in this species.  
625 However, (Chen et al., 2020) report a marked transient increase of cortisol during  
626 the early stages of protogynous sex change in orange-spotted grouper. Similar to  
627 spotty wrasse in this study, these fish do not show a significant reduction of E2  
628 during sex change. Further investigation into the role of cortisol and the interrenal  
629 axis during sex change in spotty wrasse is warranted.

630

631 *Expression of major sex determination and differentiation genes*

632

633 Core feminising (e.g. *foxl2* and *Rspo1*/Wnt/ $\beta$ -catenin signalling pathway genes)  
634 and masculinising (e.g. *dmrt1*, *sox9*, *amh*) networks direct development towards  
635 ovarian or testicular fate and are highly-conserved across vertebrates (Herpin and  
636 Schartl, 2011b; Munger and Capel, 2012). Transcription factor forkhead box L2  
637 (*Foxl2*) and ovarian specific *Rspo1*/Wnt/ $\beta$ -catenin signalling pathway genes are  
638 essential for ovarian maintenance in mammals (Yang et al., 2017) and their role  
639 in the promotion of female development in teleost fish is well established (Harris  
640 et al., 2018; Li et al., 2013; Liu et al., 2015). In spotty wrasse, *foxl2a* expression  
641 was significantly reduced in TP fish ( $X^2$  (4) = 15.05,  $p < 0.005$ ; Figure 7A). This  
642 indicates that downregulation of *foxl2a* is important in the late stages of testicular  
643 development and is not a proximate trigger for sex change in this species.  
644 Although sexually dimorphic expression of *foxl2* was not evident in three-spot  
645 wrasse (Kobayashi et al., 2010), similar expression patterns to that of the spotty  
646 wrasse have been observed in honeycomb grouper (*Epinephelus merra*) and  
647 bluehead wrasse (Alam et al., 2008; Liu, 2016). This may indicate a species-specific  
648 function of *foxl2a* in protogynous teleosts (Liu, 2016).

649

650 Studies to date confirm a conserved role of  $\beta$ -catenin (*ctnnb1*) in the establishment  
651 and maintenance of ovarian differentiation in vertebrates (Chassot et al., 2011). A  
652 consistent female-biased pattern of *ctnnb1* expression was observed in spotty  
653 wrasse with significant downregulation evident in MT and male fish ( $X^2$  (4) =  
654 36.72,  $p < 0.001$ ) (Figure 7B)., In contrast, expression of *rspo1* was significantly  
655 upregulated during sex change (MT) and male stages ( $X^2$  (4) = 35.07,  $p < 0.001$ )  
656 (Figure 7C), indicating a role in testicular development of spotty wrasses. While  
657 *rspo1* activates the Wnt/ $\beta$ -catenin signalling pathway in female mammalian  
658 development, current evidence suggests that this is less conserved in teleosts  
659 (Herpin et al., 2013; Liu et al., 2015; Manousaki et al., 2014; Zhou et al., 2012).  
660 Male-biased expression of *rspo1* was observed in the protogynous bluehead wrasse  
661 (Liu et al., 2015) and gonochoristic East African cichlid fishes (Böhne et al., 2013),  
662 while in medaka (*Oryzias latipes*), *Rspo1* activates ovarian differentiation and



663 maintenance (Zhou et al., 2012). Collectively, these data suggest that *rspo1* may  
664 participate in the development of both ovaries and testes in teleost fishes.

665

666 E3 ubiquitin-protein ligase zinc and ring finger 3 (*Znrf3*) has been reported to have  
667 a testis-determining function in mammals (Harris et al., 2018), where it can act  
668 as an inhibitory regulator of the *Rspo1*/Wnt/ $\beta$ -catenin signalling pathway through  
669 the ubiquitination and subsequent degradation of Wnt receptor complex  
670 components (Hao et al., 2012). Male mice gonads lacking *znrf3* will undergo partial  
671 or complete sex reversal (Harris et al., 2018). Expression of *znrf3* was significantly  
672 downregulated in ET through to TP spotty wrasse compared to control females ( $X^2$   
673 (4) = 18.55,  $p < 0.001$ ; Figure 7D). This provides novel information on the potential  
674 role of *znrf3* in downregulation of ovarian function at the onset of teleost sex  
675 change.

676

677 The masculinising factor *dmrt1* (doublesex and mab-3 related transcription factor  
678 1) is believed to act antagonistically to *foxl2* in order to suppress *cyp19a1a* and  
679 other female pathway genes while activating male-promoting pathways (Herpin  
680 and Schartl, 2011a; Kobayashi et al., 2013; Matson and Zarkower, 2012; Matson  
681 et al., 2011; Minkina et al., 2014). Expression of *dmrt1* was significantly  
682 upregulated in LT and TP stage spotty wrasses compared to earlier transitional  
683 and female stages ( $X^2$  (4) = 19.39,  $p < 0.001$ ; Figure 7E). *Dmrt1* disruption in male  
684 Nile tilapia caused upregulation of *foxl2* and *cyp19a1a* expression while *Foxl2*  
685 deficiency caused females to sex reverse (Li et al., 2013). A similar gene interaction  
686 may exist in spotty wrasse, where downregulation of *foxl2a* and *cyp19a1a*  
687 approximates the upregulation of *dmrt1* in later stage fish. This genetic interplay  
688 may regulate the maintenance of the new sexual phenotype rather than the  
689 initiation of sex change.

690

691 Anti-Müllerian hormone, expressed by *amh*, is strongly associated with male  
692 vertebrate sex differentiation (Josso, di Clemente and Gouédard, 2001; Pfennig et  
693 al. 2015). This masculinising association was also evident in spotty wrasse with  
694 an approximately linear increase in *amh* expression across all gonadal stages.

695 Expression of *amh* was greatest in TP males (2.2-fold, 1.6-fold and 1.4-fold greater  
696 in TP than CF, ET and MT, respectively;  $X^2(4) = 38.71$ ,  $p < 0.001$ ; Figure 7F). The  
697 apparent upregulation of *amh* with ET and MT stage spotty wrasses indicates a  
698 pivotal role in the initial stages of sex change. Furthermore, *amh* demonstrated  
699 the greatest contribution to PC1 (ovary-to-testis transition) of the PCA analysis.  
700 This is consistent with other studies that show upregulation of *amh* expression at  
701 the onset of protogynous sex change and complementary downregulation in the  
702 early stages of protandrous sex change (Hu et al., 2015; Liu et al., 2017; Wu et al.,  
703 2015). A recent mechanistic model for socially induced sex change in the  
704 protogynous bluehead wrasse suggests that early *amh* activation may be induced  
705 by the stress hormone cortisol (Todd et al., 2019). This indicates the value of  
706 further research into the role of cortisol in spotty wrasse.

707

708 Transcription factor *sox9* is another key component of male developmental  
709 pathways in vertebrates (Harris et al., 2018), and is thought to be activated by  
710 *dmrt1* in fish (Herpin and Schartl, 2011a; Herpin and Schartl, 2011b). In contrast,  
711 *sox9a* expression showed unexpected female-bias in spotty wrasse, with  
712 significant downregulation in testis compared to ovary and transitional gonads ( $X^2$   
713  $(4) = 11.23$ ,  $p < 0.05$ ; Figure 7G). Fish possess two *sox9* paralogs, *sox9a* and *sox9b*,  
714 due to the teleost whole-genome duplication (Chiang et al., 2001). Gene  
715 duplication mechanisms have been proposed to contribute to the diversity of sex  
716 determination mechanisms and sexual plasticity of fishes compared to other  
717 vertebrate systems (Ortega-Recalde et al., 2020). Neofunctionalisation, whereby a  
718 gene acquires a new function after a duplication event, has been observed in sex-  
719 changing fish (Glasauer and Neuhauss, 2014; Todd et al., 2019). For example, in  
720 the protogynous bluehead wrasse, duplicate copies of female-pathway genes (e.g.  
721 *foxl2a/b*, *wnt4a/b*) showed opposing expression patterns across female-to-male sex  
722 change (Liu et al., 2015; Todd et al., 2019). While both *sox9a* and *sox9b* are  
723 upregulated across sex change in bluehead wrasse (Liu et al., 2015), expression  
724 patterns of *sox9a* may be either female (Böhne et al., 2013; Yokoi et al., 2002) or  
725 male-biased (Baron et al., 2008; Chiang et al., 2001; Ijiri et al., 2008) in  
726 gonochoristic species. In spotty wrasses, *sox9a* may have acquired a female-

727 specific role due to such neofunctionalisation. While expression patterns support  
728 a connection to sex change regulation, they also highlight the need to examine  
729 *sox9b* expression to determine whether this paralog has conserved male-specific  
730 function in spotty wrasse gonads.

731

### 732 *Epigenetic modifiers are dynamically expressed during sex change*

733

734 The epigenetic regulation of sex differentiation and sex change has been described  
735 in several species. These epigenetic modifications have emerged as a critical  
736 liaison between environmental changes, such as temperature or social hierarchy,  
737 and sexual development (Domingos et al., 2018; Ellison et al., 2015; Navarro-  
738 Martín et al., 2011; Piferrer, 2013; Strömqvist et al., 2010; Todd et al., 2019; Wen  
739 et al., 2014; Wu et al., 2016; Zhang et al., 2013; Zhong et al., 2014). The DNA  
740 methyltransferase genes *dnmt1* and *dnmt3aa*, responsible for the maintenance  
741 and *de novo* methylation of DNA, respectively (Todd et al., 2019), showed  
742 significant changes in gonadal expression across sex change in the spotty wrasse  
743 (*dnmt1*,  $X^2(4) = 36.91$ ,  $p < 0.001$ ; *dnmt3aa*,  $X^2(4) = 30.11$ ,  $p < 0.001$ ) (Figures 8A  
744 and 8B). Although functionality cannot be inferred, the downregulation of *dnmt1*  
745 and simultaneous upregulation of *dnmt3aa* in transitional gonads indicate their  
746 involvement in the genetic cascade regulating sex change in spotty wrasse. This  
747 expression pattern is consistent with bluehead wrasse (Todd et al., 2019).  
748 Together, these data suggest epigenetic reprogramming via changes in sexually  
749 dimorphic DNA methylation is a key element orchestrating sexual fate transitions  
750 in sequential hermaphrodites.

751

752 Expression of the chromatin modifier genes *jarid2b* and *kdm6bb* was significantly  
753 downregulated during spotty wrasse sex change and is evident in the early to mid-  
754 transitional stages. Females had a median 1.4-fold greater expression of *jarid2b*  
755 ( $X^2(4) = 34.47$ ,  $p < 0.001$ ; Figure 8C) and median 1.2-fold greater expression of  
756 *kdm6bb* ( $X^2(4) = 23.41$ ,  $p < 0.001$ ; Figure 8D) than TP males. Sex-biased  
757 expression of *jarid2b* and *kdm6bb* in spotty wrasses adds further weight to  
758 growing evidence that these genes play important regulatory roles in sex change.

759 In bluehead wrasse, *jarid2* expression was transiently downregulated during sex  
760 change (Todd et al., 2019). The expression of *jarid2b* and *kdm6bb* is regulated by  
761 stress in mammalian systems (Bovill et al., 2008; Williams et al., 2014), and a  
762 temperature-dependant epigenetic regulation of these genes has been suggested  
763 to control sex reversal in the Australian bearded dragon (*Pogona vitticeps*),  
764 through *jarid2b/kdm6bb* differential intron retention induced by extreme  
765 temperatures (Deveson et al., 2017). Moreover, KDM6B promotes transcription of  
766 *Dmrt1* to regulate temperature-dependant sex determination in the red-eared  
767 slider turtle, *Trachemys scripta elegans* (Ge et al., 2018). The relationship between  
768 *kdm6bb* and *dmrt1* is yet to be explored in teleosts and may be worth further  
769 investigation.

770

#### 771 *Emerging regulators of sex change in teleosts*

772

773 E3 ubiquitin-protein ligase *Fancl* (Fanconi anaemia complementation group L) is  
774 associated with DNA repair pathways (Meetei et al., 2003). This gene generated  
775 interest after reports that Tp53-mediated germ cell apoptosis following a mutation  
776 in *fancl* jeopardised oocyte survival and induced female-to-male sex reversal in  
777 zebrafish (Rodríguez-Marí et al., 2010). However, in spotty wrasses, *fancl*  
778 expression decreased in LT and TP individuals ( $X^2(4) = 31.31$ ,  $p < 0.001$ ; Figure  
779 8E), well after apoptosis of most oocytes in the early and mid-transitional gonads.  
780 Therefore, rather than initiating sex change via oocyte apoptosis, *fancl* is more  
781 likely to be involved in the progression of gonadal transition in spotty wrasses.

782

783 Stem cell maintenance and pluripotency may be important for sex change in  
784 wrasses, where no male germ cells are identifiable prior to sex change (Todd et al.,  
785 2019). Vertebrate pluripotency factor *pou5f3* (POU domain, class 5, transcription  
786 factor 1) is critical for the maintenance and regulation of stem cell pluripotency in  
787 teleosts (Gao et al., 2017; Lacerda et al., 2019; Xiaohuan et al., 2016).  
788 Furthermore, it is able to reprogram somatic cells to become pluripotent cells in  
789 medaka (Tapia et al., 2012). In spotty wrasses, gonadal expression of *pou5f3* was  
790 downregulated across sex change, with CF and ET fish showing a median 2-fold

791 and 1.9-fold greater expression than TP males, respectively ( $X^2(4) = 36.22$ ,  $p <$   
792  $0.001$ ; Figure 8F). Gao et al. (2017) found the greatest *pou5f3* expression in  
793 Japanese flounder ovary compared to testis. Expression was evident throughout  
794 the oocyte cytoplasm while it was restricted to spermatogonial germ cells in the  
795 testis. This sexually dimorphic expression in Japanese flounder is consistent with  
796 the graded decrease in *pou5f3* expression observed across sex change in spotty  
797 wrasse. While this is the first report of *pou5f3* expression in a sequentially  
798 hermaphroditic fish, further investigation into this gene could reveal interesting  
799 information, particularly if retention of pluripotency exists in spermatogonial cells  
800 and allows for the possibility of sex reversion. Male to female reversion is currently  
801 unknown in spotty wrasse but has been reported in other protogynous wrasses  
802 (Kuwamura et al., 2002; Kuwamura et al., 2007; Ohta et al., 2003).

803

## 804 **Conclusion**

805

806 This study provides a comprehensive characterisation of the anatomical,  
807 endocrine and molecular events during sex change in the temperate-water New  
808 Zealand spotty wrasse. Sex change was successfully induced using either chemical  
809 (aromatase inhibition) or social manipulation. Seasonality influenced sex change,  
810 with a greater number of individuals undergoing gonadal transition when reduced  
811 plasma sex steroid concentrations occurred following the breeding season.  
812 NanoString gene expression analysis showed a number of gene targets followed  
813 sexually dimorphic patterns typically observed in teleosts (*foxl2a*, *dmrt1*, *amh*),  
814 while atypical patterns were observed for others (*rspo1*, *sox9a*, *znrf3*, *kdm6bb*,  
815 *pou5f3*). Importantly, these data support increasing evidence for the involvement  
816 of epigenetic regulation of gonadal sex change. Analysis of these genetic data  
817 verified that transitional fish can be accurately categorised into staged categories  
818 based on gonadal histology. Furthermore, it implicates *amh* as a proximate  
819 trigger for sex change and a beneficial marker to elucidate the difference between  
820 females undergoing seasonal ovarian atresia and ET fish. Further investigations  
821 should consider manipulative whole-organism and *in vitro* studies, including gene

822 knockdown approaches to identify specific gene functions during gonadal sex  
823 change.

824

## 825 **References**

826

827 **Alam, M. A., Kobayashi, Y., Horiguchi, R., Hirai, T. and Nakamura, M. (2008).**  
828 Molecular cloning and quantitative expression of sexually dimorphic markers  
829 Dmrt1 and Foxl2 during female-to-male sex change in *Epinephelus merra*.  
830 *Gen. Comp. Endocrinol.* **157**, 75–85.

831 **Alonso-Fernández, A., Alós, J., Grau, A., Domínguez-Petit, R. and Saborido-Rey,**  
832 **F. (2011).** The use of histological techniques to study the reproductive biology  
833 of the hermaphroditic Mediterranean fishes *Coris julis*, *Serranus scriba*, and  
834 *Diplodus annularis*. *Mar. Coast. Fish.* **3**, 145–159.

835 **Arterbery, A. S., Deitcher, D. L. and Bass, A. H. (2010).** Divergent expression of  
836 11 $\beta$ -hydroxysteroid dehydrogenase and 11 $\beta$ -hydroxylase genes between male  
837 morphs in the central nervous system, sonic muscle and testis of a vocal fish.  
838 *Gen. Comp. Endocrinol.* **167**, 44–50.

839 **Baron, D., Houlgatte, R., Fostier, A. and Guiguen, Y. (2008).** Expression profiling  
840 of candidate genes during ovary-to-testis trans-differentiation in rainbow  
841 trout masculinized by androgens. *Gen. Comp. Endocrinol.* **156**, 369–378.

842 **Benjamini, Y. and Hochberg, Y. (1995).** Controlling the false discovery rate: a  
843 practical and powerful approach to multiple testing. *J. R. Stat. Soc. Ser. B* **57**,  
844 289–300.

845 **Bhandari, R. K., Komuro, H., Nakamura, S., Higa, M. and Nakamura, M. (2003).**  
846 Gonadal restructuring and correlative steroid hormone profiles during  
847 natural sex change in protogynous honeycomb grouper (*Epinephelus merra*).  
848 *Zoolog. Sci.* **20**, 1399–1404.

849 **Bhandari, R. K., Higa, M., Nakamura, S. and Nakamura, M. (2004).** Aromatase  
850 inhibitor induces complete sex change in the protogynous honeycomb grouper  
851 (*Epinephelus merra*). *Mol. Reprod. Dev.* **67**, 303–307.

852 **Bhandari, R. K., Alam, M. A., Higa, M., Soyano, K. and Nakamura, M. (2005).**  
853 Evidence that estrogen regulates the sex change of honeycomb grouper

- 854 (*Epinephelus merra*), a protogynous hermaphrodite fish. *J. Exp. Zool. Part A*  
855 *Comp. Exp. Biol.* **303A**, 497–503.
- 856 **Böhne, A., Heule, C., Boileau, N. and Salzburger, W.** (2013). Expression and  
857 sequence evolution of aromatase *cyp19a1* and other sexual development genes  
858 in east African cichlid fishes. *Mol. Biol. Evol.* **30**, 2268–2285.
- 859 **Borg, B.** (1994). Androgens in teleost fishes. *Comp. Biochem. Physiol. Part C*  
860 *Pharmacol. Toxicol. Endocrinol.* **109**, 219–245.
- 861 **Bovill, E., Westaby, S., Reji, S., Sayeed, R., Crisp, A. and Shaw, T.** (2008).  
862 Induction by left ventricular overload and left ventricular failure of the  
863 human Jumonji gene (JARID2) encoding a protein that regulates  
864 transcription and reexpression of a protective fetal program. *J. Thorac.*  
865 *Cardiovasc. Surg.* **136**, 709–716.
- 866 **Chassot, A.-A., Gregoire, E. P., Lavery, R., Taketo, M. M., de Rooij, D. G., Adams,**  
867 **I. R. and Chaboissier, M.-C.** (2011). RSP01/β-catenin signaling pathway  
868 regulates oogonia differentiation and entry into meiosis in the mouse fetal  
869 ovary. *PLoS One* **6**, e25641.
- 870 **Chen, J., Chen, H., Peng, C., Ye, Z., Zhao, M., Xiao, L., Zhang, H., Li, S., Lin, H.**  
871 **and Zhang, Y.** (2020). A highly efficient method of inducing sex change using  
872 social control in the protogynous orange-spotted grouper (*Epinephelus*  
873 *coioides*). *Aquaculture* **517**, 734787.
- 874 **Chiang, E. F.-L., Pai, C.-I., Wyatt, M., Yan, Y.-L., Postlethwait, J. and Chung, B.**  
875 (2001). Two *Sox9* genes on duplicated zebrafish chromosomes: expression of  
876 similar transcription activators in distinct sites. *Dev. Biol.* **231**, 149–163.
- 877 **Choat, J. H.** (1965). Sexual dimorphism in the labrid fish *Pseudolabrus celidotus*  
878 (Bloch and Schneider) 1801. *Pacific Sci.* **XIX**, 451–457.
- 879 **Core Team, R.** (2013). R: A language and environment for statistical computing.
- 880 **Deveson, I. W., Holleley, C. E., Blackburn, J., Marshall Graves, J. A., Mattick, J.**  
881 **S., Waters, P. D. and Georges, A.** (2017). Differential intron retention in  
882 Jumonji chromatin modifier genes is implicated in reptile temperature-  
883 dependent sex determination. *Sci. Adv.* **3**, e1700731.
- 884 **Dheda, K., Huggett, J. F., Bustin, S. A., Johnson, M. A., Rook, G. and Zumla, A.**  
885 (2004). Validation of housekeeping genes for normalizing RNA expression in

- 886 real-time PCR. *Biotechniques* **37**, 112–119.
- 887 **Diaz de Cerio, O., Rojo-Bartolomé, I., Bizarro, C., Ortiz-Zarragoitia, M. and**  
888 **Cancio, I.** (2012). 5S rRNA and accompanying proteins in gonads: powerful  
889 markers to identify sex and reproductive endocrine disruption in fish.  
890 *Environ. Sci. Technol.* **46**, 7763–7771.
- 891 **Domingos, J. A., Budd, A. M., Banh, Q., Goldsbury, J. A., Zenger, K. R. and Jerry,**  
892 **D. R.** (2018). Sex-specific dmrt1 and cyp19a1 methylation and alternative  
893 splicing in gonads of the protandrous hermaphrodite barramundi. *PLoS One*  
894 **13**, e0204182.
- 895 **Dunn, O. J.** (1961). Multiple comparisons among means. *J. Am. Stat. Assoc.* **56**,  
896 52–64.
- 897 **Ellison, A., Rodríguez López, C. M., Moran, P., Breen, J., Swain, M., Megias, M.,**  
898 **Hegarty, M., Wilkinson, M., Pawluk, R. and Consuegra, S.** (2015). Epigenetic  
899 regulation of sex ratios may explain natural variation in self-fertilization  
900 rates. *Proc. R. Soc. B Biol. Sci.* **282**, 20151900.
- 901 **Fennessy, S. T. and Sadovy, Y.** (2002). Reproductive biology of a diandric  
902 protogynous hermaphrodite, the serranid *Epinephelus andersoni*. *Mar.*  
903 *Freshw. Res.* **53**, 147–158.
- 904 **Frisch, A.** (2004). Sex-change and gonadal steroids in sequentially-hermaphroditic  
905 teleost fish. *Rev. Fish Biol. Fish.* **14**, 481–499.
- 906 **Gao, J., Wang, X. and Zhang, Q.** (2017). Evolutionary conservation of pou5f3  
907 genomic organization and its dynamic distribution during embryogenesis and  
908 in adult gonads in Japanese flounder *Paralichthys olivaceus*. *Int. J. Mol. Sci.*  
909 **18**, 231.
- 910 **Ge, C., Ye, J., Weber, C., Sun, W., Zhang, H., Zhou, Y., Cai, C., Qian, G. and Capel,**  
911 **B.** (2018). The histone demethylase KDM6B regulates temperature-  
912 dependent sex determination in a turtle species. *Science (80-. ).* **360**, 645–648.
- 913 **Gemmell, N. J., Todd, E. V., Goikoetxea, A., Ortega-Recalde, O. and Hore, T. A.**  
914 (2019). Natural sex change in fish. In *Current Topics in Developmental*  
915 *Biology*, pp. 71–117.
- 916 **Glasauer, S. M. K. and Neuhauss, S. C. F.** (2014). Whole-genome duplication in  
917 teleost fishes and its evolutionary consequences. *Mol. Genet. Genomics* **289**,



- 918 1045–1060.
- 919 **Godwin, J. R., Crews, D. and Warner, R. R.** (1996). Behavioural sex change in the  
920 absence of gonads in a coral reef fish. *Proc. R. Soc. London. Ser. B Biol. Sci.*  
921 **263**, 1683–1688.
- 922 **Goikoetxea, A.** (2020). Stress and sex change in New Zealand spotty wrasse  
923 (*Notolabrus celidotus*).
- 924 **Goikoetxea, A., Todd, E. V and Gemmell, N. J.** (2017). Stress and sex: does cortisol  
925 mediate sex change in fish? *Reproduction* **154**, R149–R160.
- 926 **Guiguen, Y., Fostier, A., Piferrer, F. and Chang, C.-F.** (2010). Ovarian aromatase  
927 and estrogens: a pivotal role for gonadal sex differentiation and sex change in  
928 fish. *Gen. Comp. Endocrinol.* **165**, 352–366.
- 929 **Hao, H.-X., Xie, Y., Zhang, Y., Charlat, O., Oster, E., Avello, M., Lei, H., Mickanin,**  
930 **C., Liu, D., Ruffner, H., et al.** (2012). ZNRF3 promotes Wnt receptor turnover  
931 in an R-spondin-sensitive manner. *Nature* **485**, 195–200.
- 932 **Harris, A., Siggers, P., Corrochano, S., Warr, N., Sagar, D., Grimes, D. T., Suzuki,**  
933 **M., Burdine, R. D., Cong, F., Koo, B.-K., et al.** (2018). ZNRF3 functions in  
934 mammalian sex determination by inhibiting canonical WNT signaling. *Proc.*  
935 *Natl. Acad. Sci. USA* **115**, 5474–5479.
- 936 **Herpin, A. and Schartl, M.** (2011a). Dmrt1 genes at the crossroads: a widespread  
937 and central class of sexual development factors in fish. *FEBS J.* **278**, 1010–  
938 1019.
- 939 **Herpin, A. and Schartl, M.** (2011b). Sex determination: switch and suppress. *Curr.*  
940 *Biol.* **21**, R656–R659.
- 941 **Herpin, A., Adolphi, M. C., Nicol, B., Hinzmann, M., Schmidt, C., Klughammer, J.,**  
942 **Engel, M., Tanaka, M., Guiguen, Y. and Schartl, M.** (2013). Divergent  
943 expression regulation of gonad development genes in medaka shows  
944 incomplete conservation of the downstream regulatory network of vertebrate  
945 sex determination. *Mol. Biol. Evol.* **30**, 2328–2346.
- 946 **Higa, M., Ogasawara, K., Sakaguchi, A., Nagahama, Y. and Nakamura, M.** (2003).  
947 Role of steroid hormones in sex change of protogynous wrasse. *Fish Physiol.*  
948 *Biochem.* **28**, 149–150.
- 949 **Hu, Q., Guo, W., Gao, Y., Tang, R. and Li, D.** (2015). Molecular cloning and

- 950 characterization of *amh* and *dax1* genes and their expression during sex  
951 inversion in rice-field eel *Monopterus albus*. *Sci. Rep.* **5**, 16667.
- 952 **Ijiri, S., Kaneko, H., Kobayashi, T., Wang, D.-S., Sakai, F., Paul-Prasanth, B.,**  
953 **Nakamura, M. and Nagahama, Y.** (2008). Sexual dimorphic expression of  
954 genes in gonads during early differentiation of a teleost fish, the Nile tilapia  
955 *Oreochromis niloticus*. *Biol. Reprod.* **78**, 333–341.
- 956 **Jalabert, B.** (2005). Particularities of reproduction and oogenesis in teleost fish  
957 compared to mammals. *Reprod. Nutr. Dev.* **45**, 261–279.
- 958 **Jones, G. P.** (1980). Growth and reproduction in the protogynous hermaphrodite  
959 *Pseudolabrus celidotus* (Pisces: Labridae) in New Zealand. *Copeia* 660–675.
- 960 **Josso, N., di Clemente, N. and Gouédard, L.** (2001). Anti-Müllerian hormone and  
961 its receptors. *Mol. Cell. Endocrinol.* **179**, 25–32.
- 962 **Kagawa, H., Takano, K. and Nagahama, Y.** (1981). Correlation of plasma  
963 estradiol-17 $\beta$  and progesterone levels with ultrastructure and histochemistry  
964 of ovarian follicles in the white-spotted char, *Salvelinus leucomaenis*. *Cell*  
965 *Tissue Res.* **218**, 315–329.
- 966 **Kagawa, H., Young, G. and Nagahama, Y.** (1982). Estradiol-17 $\beta$  production in  
967 isolated amago salmon (*Oncorhynchus rhodurus*) ovarian follicles and its  
968 stimulation by gonadotropins. *Gen. Comp. Endocrinol.* **47**, 361–365.
- 969 **Kobayashi, Y., Horiguchi, R., Nozu, R. and Nakamura, M.** (2010). Expression and  
970 localization of forkhead transcriptional factor 2 (Foxl2) in the gonads of  
971 protogynous wrasse, *Halichoeres trimaculatus*. *Biol. Sex Differ.* **1**, 3.
- 972 **Kobayashi, Y., Nagahama, Y. and Nakamura, M.** (2013). Diversity and plasticity  
973 of sex determination and differentiation in fishes. *Sex. Dev.* **7**, 115–125.
- 974 **Kojima, Y., Bhandari, R. K., Kobayashi, Y. and Nakamura, M.** (2008). Sex change  
975 of adult initial-phase male wrasse, *Halichoeres trimaculatus* by estradiol-17 $\beta$   
976 treatment. *Gen. Comp. Endocrinol.* **156**, 628–632.
- 977 **Kroon, F. J. and Liley, N. R.** (2000). The role of steroid hormones in protogynous  
978 sex change in the blackeye goby, *Coryphopterus nicholsii* (Teleostei:  
979 Gobiidae). *Gen. Comp. Endocrinol.* **118**, 273–283.
- 980 **Kroon, F. J., Munday, P. L., Westcott, D. A., Hobbs, J.-P. A. and Liley, N. R.** (2005).  
981 Aromatase pathway mediates sex change in each direction. *Proc. R. Soc. B*

- 982 *Biol. Sci.* **272**, 1399–1405.
- 983 **Kruskal, W. H. and Wallis, W. A.** (1952). Use of ranks in one-criterion variance  
984 analysis. *J. Am. Stat. Assoc.* **47**, 583–621.
- 985 **Kuwamura, T., Tanaka, N., Nakashima, Y., Karino, K. and Sakai, Y.** (2002).  
986 Reversed sex-change in the protogynous reef fish *Labroides dimidiatus*.  
987 *Ethology* **108**, 443–450.
- 988 **Kuwamura, T., Suzuki, S., Tanaka, N., Ouchi, E., Karino, K. and Nakashima, Y.**  
989 (2007). Sex change of primary males in a diandric labrid *Halichoeres*  
990 *trimaculatus*: coexistence of protandry and protogyny within a species. *J. Fish*  
991 *Biol.* **70**, 1898–1906.
- 992 **Lacerda, S. M. S. N., Martinez, E. R. M., Mura, I. L. D. D., Doretto, L. B., Costa,**  
993 **G. M. J., Silva, M. A., Digmayer, M., Nóbrega, R. H. and França, L. R.** (2019).  
994 Duration of spermatogenesis and identification of spermatogonial stem cell  
995 markers in a Neotropical catfish, Jundiá (*Rhamdia quelen*). *Gen. Comp.*  
996 *Endocrinol.* **273**, 249–259.
- 997 **Lamm, M. S., Liu, H., Gemmell, N. J. and Godwin, J. R.** (2015). The need for speed:  
998 neuroendocrine regulation of socially-controlled sex change. *Integr. Comp.*  
999 *Biol.* **55**, 307–322.
- 1000 **Lee, Y.-H., Du, J.-L., Yueh, W.-S., Lin, B.-Y., Huang, J.-D., Lee, C.-Y., Lee, M.-F.,**  
1001 **Lau, E.-L., Lee, F.-Y., Morrey, C. E., et al.** (2001). Sex change in the  
1002 protandrous black porgy, *Acanthopagrus schlegeli*: a review in gonadal  
1003 development, estradiol, estrogen receptor, aromatase activity and  
1004 gonadotropin. *J. Exp. Zool.* **290**, 715–7261.
- 1005 **Li, G.-L., Liu, X.-C. and Lin, H.-R.** (2007). Seasonal changes of serum sex steroids  
1006 concentration and aromatase activity of gonad and brain in red-spotted  
1007 grouper (*Epinephelus akaara*). *Anim. Reprod. Sci.* **99**, 156–166.
- 1008 **Li, M., Yang, H.-H., Li, M.-R., Sun, Y.-L., Jiang, X.-L., Xie, Q.-P., Wang, T.-R., Shi,**  
1009 **H.-J., Sun, L.-N., Zhou, L.-Y., et al.** (2013). Antagonistic roles of Dmrt1 and  
1010 Foxl2 in sex differentiation via estrogen production in tilapia as demonstrated  
1011 by TALENs. *Endocrinology* **154**, 4814–4825.
- 1012 **Li, M., Sun, L.-N. and Wang, D.** (2019). Roles of estrogens in fish sexual plasticity  
1013 and sex differentiation. *Gen. Comp. Endocrinol.* **277**, 9–16.

- 1014 **Liu, H.** (2016). Genomic basis of sex change in fish.
- 1015 **Liu, H., Lamm, M. S., Rutherford, K., Black, M. A., Godwin, J. R. and Gemmell,**  
1016 **N. J.** (2015). Large-scale transcriptome sequencing reveals novel expression  
1017 patterns for key sex-related genes in a sex-changing fish. *Biol. Sex Differ.* **6**,  
1018 1–20.
- 1019 **Liu, H., Todd, E. V, Lokman, P. M., Lamm, M. S., Godwin, J. R. and Gemmell, N.**  
1020 **J.** (2017). Sexual plasticity: a fishy tale. *Mol. Reprod. Dev.* **84**, 171–194.
- 1021 **Lokman, P. M., Irwin, L., Blackwell, L. F., Davie, P. S., Thomas, M. and Young,**  
1022 **G.** (1997). A simple two-step method for the conversion of [3H]cortisol to [3H]-  
1023 11-ketotestosterone. *Steroids* **62**, 655–658.
- 1024 **Lokman, P. M., Wylie, M. J., Downes, M., Di Biase, A. and Damsteegt, E. L.** (2015).  
1025 Artificial induction of maturation in female silver eels, *Anguilla australis*: the  
1026 benefits of androgen pre-treatment. *Aquaculture* **437**, 111–119.
- 1027 **Lubzens, E., Young, G., Bobe, J. and Cerdà, J.** (2010). Oogenesis in teleosts: How  
1028 fish eggs are formed. *Gen. Comp. Endocrinol.* **165**, 367–389.
- 1029 **Manousaki, T., Tsakogiannis, A., Lagnel, J., Sarropoulou, E., Xiang, J. Z.,**  
1030 **Papandroulakis, N., Mylonas, C. C. and Tsigenopoulos, C. S.** (2014). The sex-  
1031 specific transcriptome of the hermaphrodite sparid sharpsnout seabream  
1032 (*Diplodus puntazzo*). *BMC Genomics* **15**, 655.
- 1033 **Matson, C. K. and Zarkower, D.** (2012). Sex and the singular DM domain: insights  
1034 into sexual regulation, evolution and plasticity. *Nat. Rev. Genet.* **13**, 163–174.
- 1035 **Matson, C. K., Murphy, M. W., Sarver, A. L., Griswold, M. D., Bardwell, V. J. and**  
1036 **Zarkower, D.** (2011). DMRT1 prevents female reprogramming in the  
1037 postnatal mammalian testis. *Nature* **476**, 101–104.
- 1038 **Maxfield, J.M. and Cole, K. S.** (2019). Patterns of structural change in gonads of  
1039 the divine dwarfgoby *Eviota epiphanes* as they sexually transition. *J. Fish*  
1040 *Biol.* **94**, 142–153
- 1041 **Meetei, A. R., de Winter, J. P., Medhurst, A. L., Wallisch, M., Waisfisz, Q., Van de**  
1042 **Vrugt, H. J., Oostra, A. B., Yan, Z., Ling, C., Bishop, C. E., et al.** (2003). A  
1043 novel ubiquitin ligase is deficient in Fanconi anemia. *Nat. Genet.* **35**, 165–  
1044 170.
- 1045 **Minkina, A., Matson, C. K., Lindeman, R. E., Ghyselinck, N. B., Bardwell, V. J.**

- 1046        **and Zarkower, D.** (2014). DMRT1 protects male gonadal cells from retinoid-  
1047        dependent sexual transdifferentiation. *Dev. Cell* **29**, 511–520.
- 1048   **Miura, T., Yamauchi, K., Takahashi, H. and Nagahama, Y.** (1991). Hormonal  
1049        induction of all stages of spermatogenesis in vitro in the male Japanese eel  
1050        (*Anguilla japonica*). *Proc. Natl. Acad. Sci. USA* **88**, 5774–5778.
- 1051   **Muncaster, S., Andersson, E., Kjesbu, O. S., Taranger, G. L., Skiftesvik, A. B. and**  
1052        **Norberg, B.** (2010). The reproductive cycle of female Ballan wrasse *Labrus*  
1053        *bergylta* in high latitude, temperate waters. *J. Fish Biol.* 494–511.
- 1054   **Muncaster, S., Norberg, B. and Andersson, E.** (2013). Natural sex change in the  
1055        temperate protogynous Ballan wrasse *Labrus bergylta*. *J. Fish Biol.* **82**, 1858–  
1056        1870.
- 1057   **Munger, S. C. and Capel, B.** (2012). Sex and the circuitry: progress toward a  
1058        systems-level understanding of vertebrate sex determination. *Wiley*  
1059        *Interdiscip. Rev. Syst. Biol. Med.* **4**, 401–412.
- 1060   **Nagahama, Y.** (1994). Endocrine regulation of gametogenesis in fish. *Int. J. Dev.*  
1061        *Biol.* **38**, 217–229.
- 1062   **Nakamura, M., Hourigan, T. F., Yamauchi, K., Nagahama, Y. and Grau, E. G.**  
1063        (1989). Histological and ultrastructural evidence for the role of gonadal  
1064        steroid hormones in sex change in the protogynous wrasse *Thalassoma*  
1065        *duperrey*. *Environ. Biol. Fishes* **24**, 117–136.
- 1066   **Nakamura, M., Kobayashi, Y., Miura, S., Alam, M. A. and Bhandari, R. K.** (2005).  
1067        Sex change in coral reef fish. *Fish Physiol. Biochem.* **31**, 117–122.
- 1068   **Nakamura, M., Miura, S., Nozu, R. and Kobayashi, Y.** (2015). Opposite-directional  
1069        sex change in functional female protandrous anemonefish, *Amphiprion*  
1070        *clarkii*: effect of aromatase inhibitor on the ovarian tissue. *Zool. Lett.* **1**, 30.
- 1071   **Navarro-Martín, L., Viñas, J., Ribas, L., Díaz, N., Gutiérrez, A., Di Croce, L. and**  
1072        **Piferrer, F.** (2011). DNA methylation of the gonadal aromatase (cyp19a)  
1073        promoter is involved in temperature-dependent sex ratio shifts in the  
1074        European sea bass. *PLOS Genet.* **7**, e1002447.
- 1075   **Nozu, R., Kojima, Y. and Nakamura, M.** (2009). Short term treatment with  
1076        aromatase inhibitor induces sex change in the protogynous wrasse,  
1077        *Halichoeres trimaculatus*. *Gen. Comp. Endocrinol.* **161**, 360–364.

- 1078 Ohta, K., Sundaray, J. K., Okida, T., Sakai, M., Kitano, T., Yamaguchi, A., Takeda,  
1079 T. and Matsuyama, M. (2003). Bi-directional sex change and its  
1080 steroidogenesis in the wrasse, *Pseudolabrus sieboldi*. *Fish Physiol. Biochem.*  
1081 **28**, 173–174.
- 1082 Ohta, K., Hirano, M., Mine, T., Mizutani, H., Yamaguchi, A. and Matsuyama, M.  
1083 (2008). Body color change and serum steroid hormone levels throughout the  
1084 process of sex change in the adult wrasse, *Pseudolabrus sieboldi*. *Mar. Biol.*  
1085 **153**, 843–852.
- 1086 Ortega-Recalde, O., Goikoetxea, A., Hore, T. A., Todd, E. V and Gemmell, N. J.  
1087 (2020). The genetics and epigenetics of sex change in fish. *Annu. Rev. Anim.*  
1088 *Biosci.* **8**, annurev-animal-021419-083634.
- 1089 Patiño, R. and Sullivan, C. V (2002). Ovarian follicle growth, maturation, and  
1090 ovulation in teleost fish. *Fish Physiol. Biochem.* **26**, 57–70.
- 1091 Paul-Prasanth, B., Bhandari, R. K., Kobayashi, T., Horiguchi, R., Kobayashi, Y.,  
1092 Nakamoto, M., Shibata, Y., Sakai, F., Nakamura, M. and Nagahama, Y.  
1093 (2013). Estrogen oversees the maintenance of the female genetic program in  
1094 terminally differentiated gonochorists. *Sci. Rep.* **3**, 2862.
- 1095 Pfaffl, M. W., Tichopad, A., Prgomet, C. and Neuvians, T. P. (2004). Determination  
1096 of stable housekeeping genes, differentially regulated target genes and  
1097 sample integrity: BestKeeper – Excel-based tool using pair-wise correlations.  
1098 *Biotechnol. Lett.* **26**, 509–515.
- 1099 Piferrer, F. (2013). Epigenetics of sex determination and gonadogenesis. *Dev. Dyn.*  
1100 **242**, 360–370.
- 1101 Reavis, R. H. and Grober, M. S. (1999). An integrative approach to sex change:  
1102 social, behavioural and neurochemical changes in *Lythrypnus dalli* (Pisces).  
1103 *Acta. Ethol.* **2**, 51–60.
- 1104 Rodríguez-Marí, A., Cañestro, C., Bremiller, R. A., Nguyen-Johnson, A., Asakawa,  
1105 K., Kawakami, K. and Postlethwait, J. H. (2010). Sex reversal in zebrafish  
1106 fancl mutants is caused by Tp53-mediated germ cell apoptosis. *PLOS Genet.*  
1107 **6**, e1001034.
- 1108 Sadovy, Y. and Shapiro, D. Y. (1987). Criteria for the diagnosis of  
1109 hermaphroditism in fishes. *Copeia* **1987**, 136–156.

- 1110 **Schulz, R. W.** (1986). *In vitro* metabolism of steroid hormones in the liver and in  
1111 blood cells of male rainbow trout (*Salmo gairdneri* Richardson). *Gen. Comp.*  
1112 *Endocrinol.* **64**, 312–319.
- 1113 **Schulz, R. W., de França, L. R., Lareyre, J.-J., LeGac, F., Chiarini-Garcia, H.,**  
1114 **Nobrega, R. H. and Miura, T.** (2010). Spermatogenesis in fish. *Gen. Comp.*  
1115 *Endocrinol.* **165**, 390–411.
- 1116 **Scott, A. P., MacKenzie, D. S. and Stacey, N. E.** (1984). Endocrine changes during  
1117 natural spawning in the white sucker, *Catostomus commersoni*. *Gen. Comp.*  
1118 *Endocrinol.* **56**, 349–359.
- 1119 **Semsar, K. and Godwin, J. R.** (2004). Multiple mechanisms of phenotype  
1120 development in the bluehead wrasse. *Horm. Behav.* **45**, 345–353.
- 1121 **Setiawan, A. N. and Lokman, P. M.** (2010). The use of reference gene selection  
1122 programs to study the silvering transformation in a freshwater eel *Anguilla*  
1123 *australis*: a cautionary tale. *BMC Mol. Biol.* **11**, 75.
- 1124 **Sherwood, N. M., Crim, L. W., Carolsfeld, J. and Walters, S. M.** (1988). Sustained  
1125 hormone release. I. Characteristics of *in vitro* release of gonadotropin-  
1126 releasing hormone analogue (GnRH-A) from pellets. *Aquaculture* **74**, 75–86.
- 1127 **Solomon-Lane, T. K., Crespi, E. J., Grober, M. S.** (2013). Stress and serial adult  
1128 metamorphosis: multiple roles for the stress axis in socially regulated sex  
1129 change. *Frontiers in Neuroscience* **7**, 1–12.
- 1130 **Sprenger, D., Dingemans, N. J., Dochtermann, N. A. Theobald J. and Walker,**  
1131 **S. P. W.** (2012). Aggressive females become aggressive males in a  
1132 sex-changing reef fish. *Ecology Letters* **15**, 986–992.
- 1133 **Strömqvist, M., Tooke, N. and Brunström, B.** (2010). DNA methylation levels in  
1134 the 5' flanking region of the vitellogenin I gene in liver and brain of adult  
1135 zebrafish (*Danio rerio*)—sex and tissue differences and effects of 17 $\alpha$ -  
1136 ethinylestradiol exposure. *Aquat. Toxicol.* **98**, 275–281.
- 1137 **Takatsu, K., Miyaoku, K., Roy, S. R., Muro, Y., Sago, T., Itagaki, H., Nakamura,**  
1138 **M. and Tokumoto, T.** (2013). Induction of female-to-male sex change in adult  
1139 zebrafish by aromatase inhibitor treatment. *Sci. Rep.* **3**, 3400.
- 1140 **Tapia, N., Reinhardt, P., Duemmler, A., Wu, G., Araúz-Bravo, M. J., Esch, D.,**  
1141 **Greber, B., Cojocar, V., Rascon, C. A., Tazaki, A., et al.** (2012).

- 1142 Reprogramming to pluripotency is an ancient trait of vertebrate Oct4 and  
1143 Pou2 proteins. *Nat. Commun.* **3**, 1279.
- 1144 **Thomas, J. T., Todd, E. V, Muncaster, S., Lokman, P. M., Damsteegt, E. L., Liu,**  
1145 **H., Soyano, K., Gléonnec, F., Lamm, M. S., Godwin, J. R., et al. (2019).**  
1146 Conservation and diversity in expression of candidate genes regulating  
1147 socially-induced female-male sex change in wrasses. *PeerJ* **7**, e7032.
- 1148 **Todd, E. V, Liu, H., Muncaster, S. and Gemmell, N. J. (2016).** Bending genders:  
1149 the biology of natural sex change in fish. *Sex. Dev.* **10**, 223–241.
- 1150 **Todd, E. V, Liu, H., Lamm, M. S., Thomas, J. T., Rutherford, K., Thompson, K. C.,**  
1151 **Godwin, J. R. and Gemmell, N. J. (2018).** Female mimicry by sneaker males  
1152 has a transcriptomic signature in both the brain and the gonad in a sex-  
1153 changing fish. *Mol. Biol. Evol.* **35**, 225–241.
- 1154 **Todd, E. V, Ortega-Recalde, O., Liu, H., Lamm, M. S., Rutherford, K. M., Cross,**  
1155 **H., Black, M. A., Kardailsky, O., Marshall Graves, J. A., Hore, T. A., et al.**  
1156 **(2019).** Stress, novel sex genes, and epigenetic reprogramming orchestrate  
1157 socially controlled sex change. *Sci. Adv.* **5**, eaaw7006.
- 1158 **Wen, A. Y., You, F., Sun, P., Li, J., Xu, D. D., Wu, Z. H., Ma, D. Y. and Zhang, P.**  
1159 **J. (2014).** CpG methylation of *dmrt1* and *cyp19a* promoters in relation to their  
1160 sexual dimorphic expression in the Japanese flounder *Paralichthys olivaceus*.  
1161 *J. Fish Biol.* **84**, 193–205.
- 1162 **Williams, K., Christensen, J., Rappsilber, J., Nielsen, A. L., Johansen, J. V. and**  
1163 **Helin, K. (2014).** The histone lysine demethylase JMJD3/KDM6B is recruited  
1164 to p53 bound promoters and enhancer elements in a p53 dependent manner.  
1165 *PLoS One* **9**, e96545.
- 1166 **Wu, G.-C., Li, H.-W., Luo, J.-W., Chen, C. and Chang, C.-F. (2015).** The potential  
1167 role of Amh to prevent ectopic female development in testicular tissue of the  
1168 protandrous black bogy, *Acanthopagrus schlegelii*. *Biol. Reprod.* **92**, 1–13.
- 1169 **Wu, G.-C., Li, H.-W., Huang, C.-H., Lin, H.-J., Lin, C.-J. and Chang, C.-F. (2016).**  
1170 The testis is a primary factor that contributes to epigenetic modifications in  
1171 the ovaries of the protandrous black porgy, *Acanthopagrus schlegelii*. *Biol.*  
1172 *Reprod.* **94**, 132.
- 1173 **Xiaohuan, H., Yang, Z., Linyan, L., Zhenhua, F., Linyan, Z., Zhijian, W., Ling, W.,**



- 1174 **Deshou, W. and Jing, W.** (2016). Characterization of the POU5F1 homologue  
1175 in Nile tilapia: from expression pattern to biological activity. *Stem Cells Dev.*  
1176 **25**, 1386–1395.
- 1177 **Xie, F., Xiao, P., Chen, D., Xu, L. and Zhang, B.** (2012). miRDeepFinder: a miRNA  
1178 analysis tool for deep sequencing of plant small RNAs. *Plant Mol. Biol.* **80**,  
1179 75–84.
- 1180 **Yang, Y.-J., Wang, Y., Li, Z., Zhou, L. and Gui, J.-F.** (2017). Sequential, divergent,  
1181 and cooperative requirements of *Foxl2a* and *Foxl2b* in ovary development and  
1182 maintenance of zebrafish. *Genetics* **205**, 1551–1572.
- 1183 **Yokoi, H., Kobayashi, T., Tanaka, M., Nagahama, Y., Wakamatsu, Y., Takeda, H.,**  
1184 **Araki, K., Morohashi, K.-I. and Ozato, K.** (2002). *sox9* in a teleost fish, medaka  
1185 (*Oryzias latipes*): Evidence for diversified function of *Sox9* in gonad  
1186 differentiation. *Mol. Reprod. Dev.* **63**, 5–16.
- 1187 **Young, G., Crim, L. W., Kagawa, H., Kambegawa, A. and Nagahama, Y.** (1983).  
1188 Plasma 17 $\alpha$ ,20 $\beta$ -dihydroxy-4-pregnen-3-one levels during sexual maturation  
1189 of amago salmon (*Oncorhynchus rhodurus*): correlation with plasma  
1190 gonadotropin and *in vitro* production by ovarian follicles. *Gen. Comp.*  
1191 *Endocrinol.* **51**, 96–105.
- 1192 **Zhang, Y., Zhang, S., Liu, Z., Zhang, L. and Zhang, W.** (2013). Epigenetic  
1193 modifications during sex change repress gonadotropin stimulation of  
1194 *Cyp19a1a* in a teleost ricefield eel (*Monopterus albus*). *Endocrinology* **154**,  
1195 2881–2890.
- 1196 **Zhong, H., Xiao, J., Chen, W., Zhou, Y., Tang, Z., Guo, Z., Luo, Y., Lin, Z., Gan, X.**  
1197 **and Zhang, M.** (2014). DNA methylation of pituitary growth hormone is  
1198 involved in male growth superiority of Nile tilapia (*Oreochromis niloticus*).  
1199 *Comp. Biochem. Physiol. Part B Biochem. Mol. Biol.* **171**, 42–48.
- 1200 **Zhou, L.-Y., Charkraborty, T., Yu, X., Wu, L., Liu, G., Mohapatra, S., Wang, D.-S.**  
1201 **and Nagahama, Y.** (2012). R-spondins are involved in the ovarian  
1202 differentiation in a teleost, medaka (*Oryzias latipes*). *BMC Dev. Biol.* **12**, 36.  
1203

1204 **Figure legends:**

1205

1206 Figure 1. Life cycle of New Zealand spotty wrasse (*Notolabrus celidotus*). Juveniles  
1207 first develop into either initial phase (IP) females or males, which can then become  
1208 terminal phase (TP) males via sex or role change, respectively. Adapted from  
1209 (Thomas et al., 2019; Todd et al., 2018). IP spotty wrasse image by Allan Burgess,  
1210 TP spotty wrasse image by Jodi Thomas.

1211

1212 Figure 2. Histological stages of gonadal development observed in spotty wrasses  
1213 from the SI2018 experiment: a) control non-breeding females: ovary filled with  
1214 previtellogenic oocytes; b) early transitioning fish: visible nests of gonial cells,  
1215 yellow-brown bodies and stromal cells; c) mid-transitioning fish: evidence of  
1216 proliferation of spermatogenic cysts; d) late transitioning fish: male germ cells  
1217 dominate over female structures; e) terminal phase male: mature testes showing  
1218 cysts of spermatocytes and spermatozoa. Abbreviations: atretic previtellogenic  
1219 oocyte (APVO), gonial cell (GC), previtellogenic oocyte (PVO), stromal cell (SC),  
1220 spermatocyte (SPC), spermatogonia (SPG), spermatozoa (SPZ), yellow-brown body  
1221 (YBB). Scale bar: 100  $\mu$ m.

1222

1223 Figure 3. Proportion of SI2016 and SI2018 spotty wrasses in different sexual  
1224 phases depending on month of sampling. Abbreviations: breeding female (BF),  
1225 early transitioning fish (ET), late transitioning fish (LT), mid-transitioning fish  
1226 (MT), non-breeding female (NBF), social induction experiment 2016 (SI2016),  
1227 social induction experiment 2018 (SI2018), terminal phase male (TP). Sample  
1228 sizes: October n=4, November n=13, December n=5, January n=20, February n=20,  
1229 March n=0, April n=9.

1230

1231 Figure 4. Plasma E2 (A) and 11KT (B) concentrations in control females,  
1232 manipulated breeding females, early, mid- and late transitioning fish, and TP and  
1233 IP males obtained across the three experiments, AI2014, SI2016 and SI2018. Each  
1234 red (AI2014), yellow (SI2016) and blue (SI2018) line represents the variation in  
1235 mean E2 or 11KT concentrations across groups per experiment while the black line

1236 represents the variation in overall mean concentrations for the three experiments  
1237 altogether. Sample sizes: E2, CF n = 32, BF n = 4, ET n = 42, MT n = 8, LT n = 14,  
1238 TP<sup>†</sup> n = 17, IP n = 5; 11KT, CF n = 35, BF n = 5, ET n = 41, MT n = 9, LT n = 15,  
1239 TP<sup>†</sup> n = 26, IP n = 4. Abbreviations: 11-ketotestosterone (11KT), aromatase inhibition  
1240 experiment 2014 (AI2014), breeding female (BF), control female (CF), 17 $\beta$ -estradiol  
1241 (E2), early transitioning fish (ET), initial phase male (IP), late transitioning fish  
1242 (LT), mid-transitioning fish (MT), social induction experiment 2016 (SI2016),  
1243 social induction experiment 2018 (SI2018), terminal phase male (TP). <sup>†</sup>Both  
1244 control males used throughout the experiments to create a socially inhibitory  
1245 environment (SI2016: E2 n = 10, 11KT n = 10; SI2018: E2 n = 0, 11KT n = 10), and  
1246 males obtained through sex change of manipulated females (SI2016: E2 n = 1,  
1247 11KT n = 1; SI2018: E2 n = 5, 11KT n = 5) were grouped altogether as TP males  
1248 for the purpose of this analysis.

1249

1250 Figure 5. PCA (18 genes) of gonad samples. The transition from females to males  
1251 is captured along PC1 (50.7% variance), whereas PC2 (19.4% variance) extremes  
1252 represent sexually differentiated gonads (bottom) and transitional gonads (top).  
1253 Sample sizes: CF n = 5, ET n = 19, MT n = 9, LT n = 9, TP n = 5. Abbreviations:  
1254 control female (CF), early transitioning fish (ET), late transitioning fish (LT), mid-  
1255 transitioning fish (MT), terminal phase male (TP).

1256

1257 Figure 6. Relative gonadal expression of *cyp19a1a* (A), *cyp11c1* (B), *hsd11b2* (C),  
1258 *nr3c1* (D) and *nr3c2* (E) mRNA. Expression levels are compared among control  
1259 females sampled on day 0, transitioning individuals and TP males. In the boxplots,  
1260 each point represents an individual fish, the middle bold line represents the  
1261 median, the edges of the box represent the upper and lower quartiles, and vertical  
1262 lines represent the minimum and maximum values. Letters denote a significant  
1263 difference in distribution between groups. Sample sizes: CF n = 5, ET n = 19, MT  
1264 n = 9, LT n = 9, TP<sup>†</sup> n = 5. Abbreviations: control female (CF), early transitioning  
1265 fish (ET), late transitioning fish (LT), mid-transitioning fish (MT), terminal phase  
1266 male (TP). <sup>†</sup>Both a male used during the acclimation period of the experiment (n =

1267 1), and males obtained through sex change of socially manipulated females (n = 4)  
1268 were grouped altogether as TP males for the purpose of this analysis.

1269

1270 Figure 7. Relative gonadal expression of *foxl2a* (A), *ctnnb1* (B), *rspo1* (C), *znrf3* (D),  
1271 *dmrt1* (E), *amh* (F) and *sox9a* (G) mRNA. Expression levels are compared among  
1272 control females sampled on day 0, transitioning individuals and TP males. In the  
1273 boxplots, each point represents an individual fish, the middle bold line represents  
1274 the median, the edges of the box represent the upper and lower quartiles, and  
1275 vertical lines represent the minimum and maximum values. Letters denote a  
1276 significant difference in distribution between groups. Sample sizes: CF n = 5, ET n  
1277 = 19, MT n = 9, LT n = 9, TP<sup>†</sup> n = 5. Abbreviations: control female (CF), early  
1278 transitioning fish (ET), late transitioning fish (LT), mid-transitioning fish (MT),  
1279 terminal phase male (TP). <sup>†</sup>Both a male used during the acclimation period of the  
1280 experiment (n = 1), and males obtained through sex change of socially manipulated  
1281 females (n = 4) were grouped altogether as TP males for the purpose of this  
1282 analysis.

1283

1284 Figure 8. Relative gonadal expression of *dnmt1* (A), *dnmt3aa* (B), *jarid2b* (C),  
1285 *kdm6bb* (D), *fancl* (E) and *pou5f3* (F) mRNA. Expression levels are compared  
1286 among control females sampled on day 0, transitioning individuals and TP males.  
1287 In the boxplots, each point represents an individual fish, the middle bold line  
1288 represents the median, the edges of the box represent the upper and lower  
1289 quartiles, and vertical lines represent the minimum and maximum values. Letters  
1290 denote a significant difference in distribution between groups. Sample sizes: CF n  
1291 = 5, ET n = 19, MT n = 9, LT n = 9, TP<sup>†</sup> n = 5. Abbreviations: control female (CF),  
1292 early transitioning fish (ET), late transitioning fish (LT), mid-transitioning fish  
1293 (MT), terminal phase male (TP). <sup>†</sup>Both a male used during the acclimation period  
1294 of the experiment (n = 1), and males obtained through sex change of socially  
1295 manipulated females (n = 4) were grouped altogether as TP males for the purpose  
1296 of this analysis.

1297

1298

1299 Figure 1:

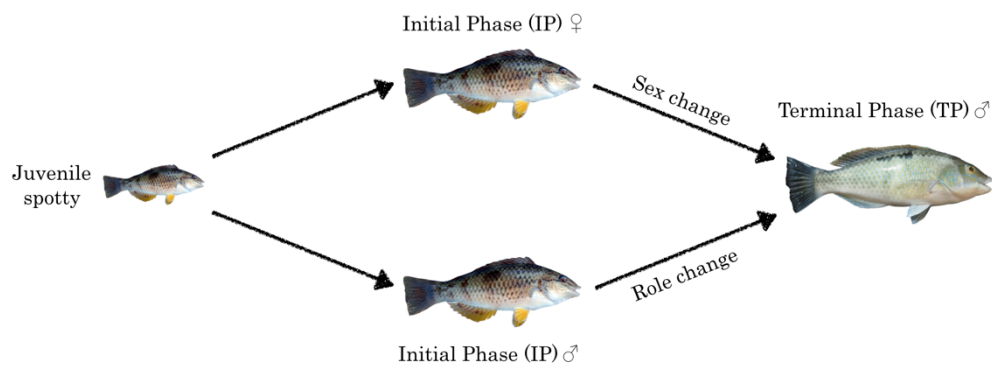

1300

1301

1302

1303

1304

1305

1306

1307

1308

1309

1310

1311

1312

1313

1314

1315

1316

1317

1318

1319

1320 Figure 2:

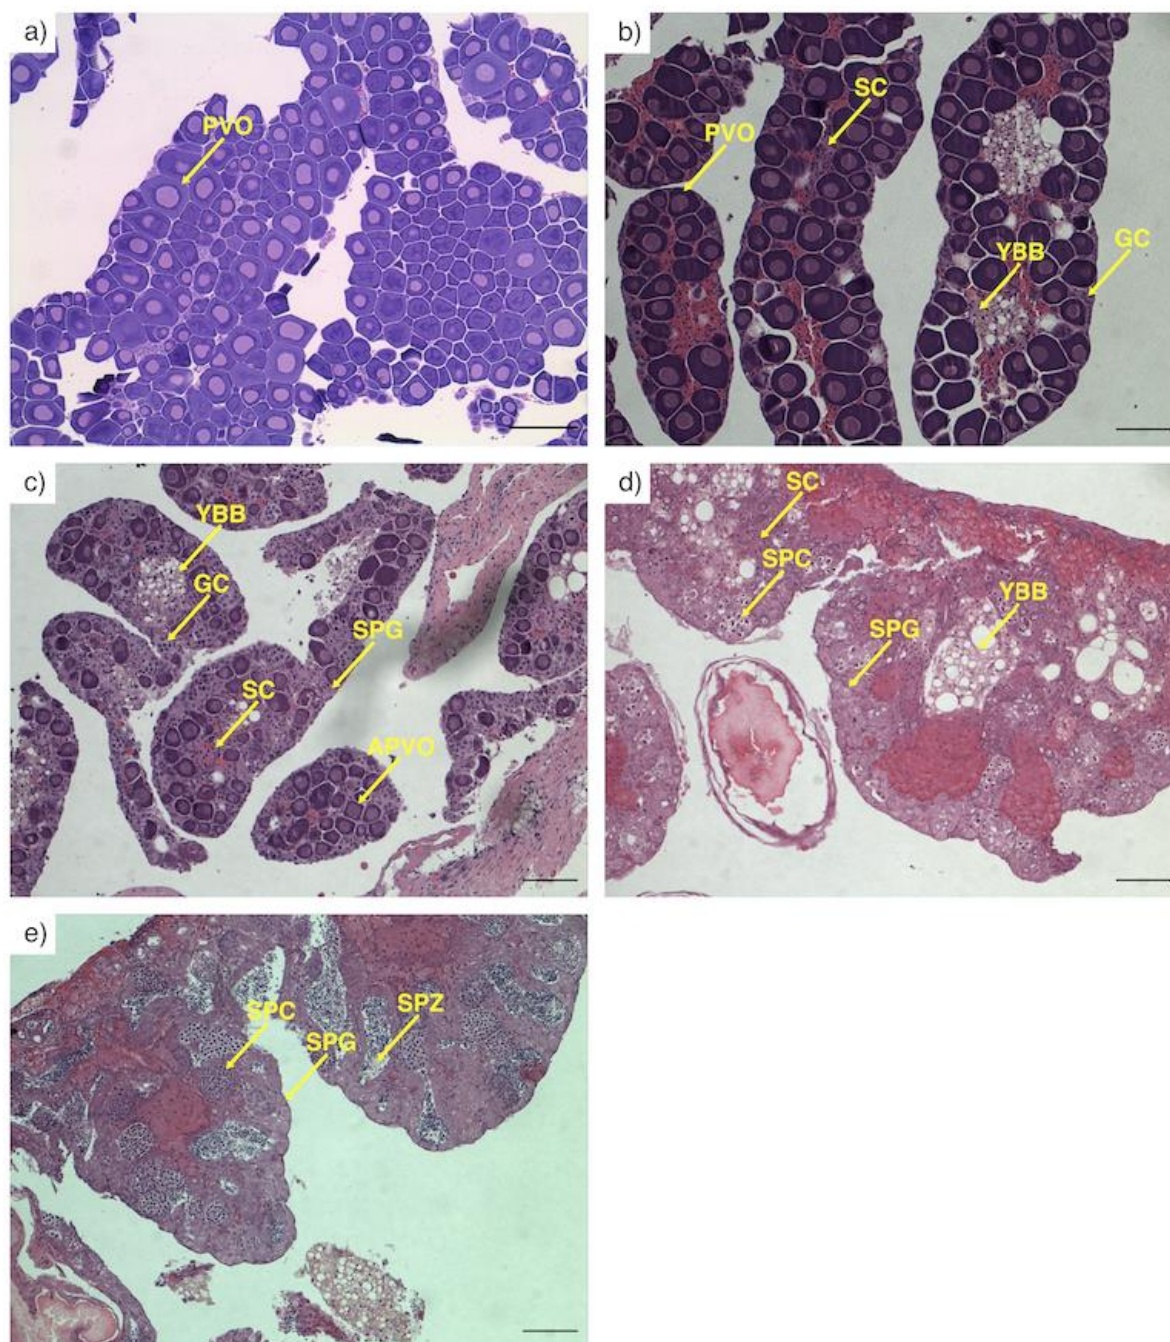

1321

1322

1323

1324

1325

1326

1327

1328

1329 Figure 3:

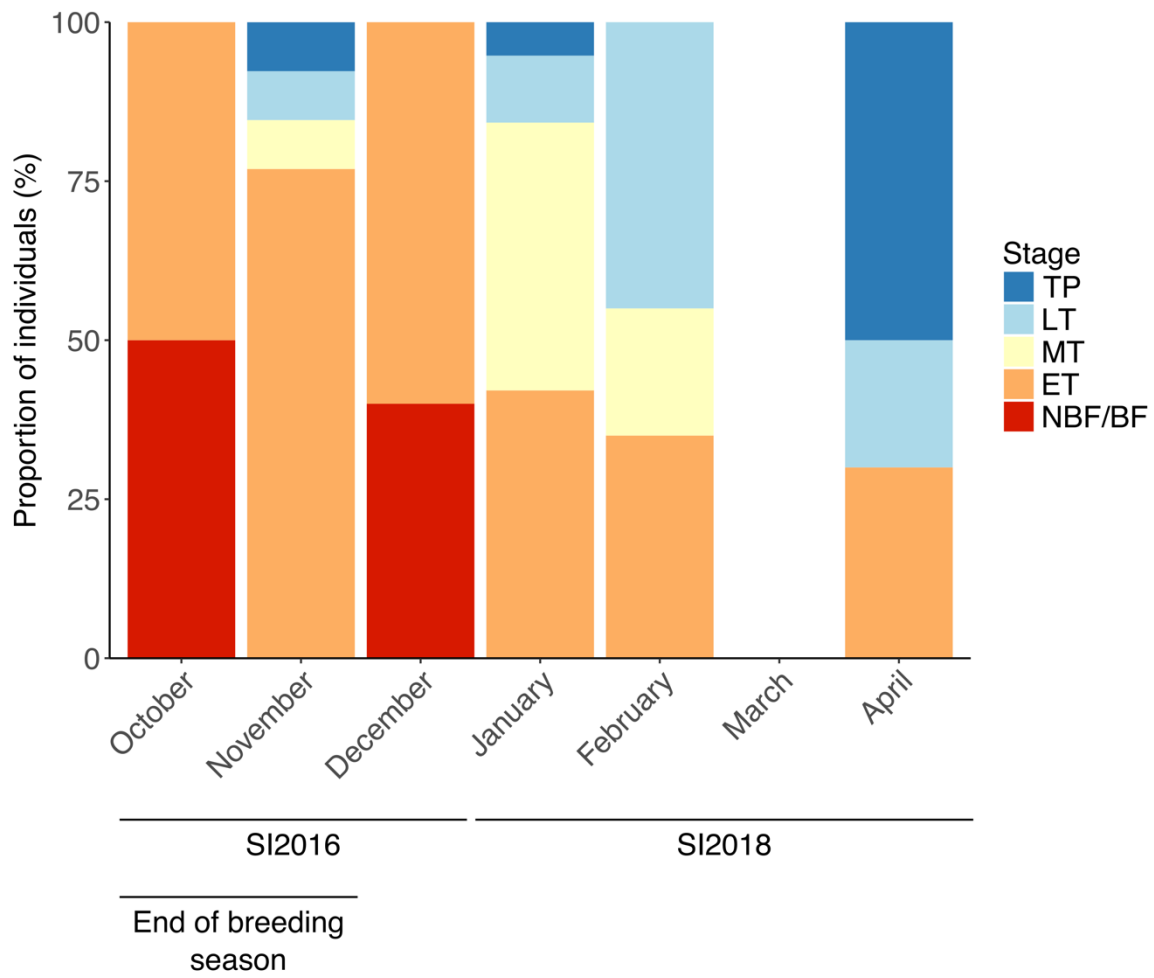

1330  
1331  
1332  
1333  
1334  
1335  
1336  
1337  
1338  
1339  
1340  
1341  
1342  
1343

1344 Figure 4:

1345

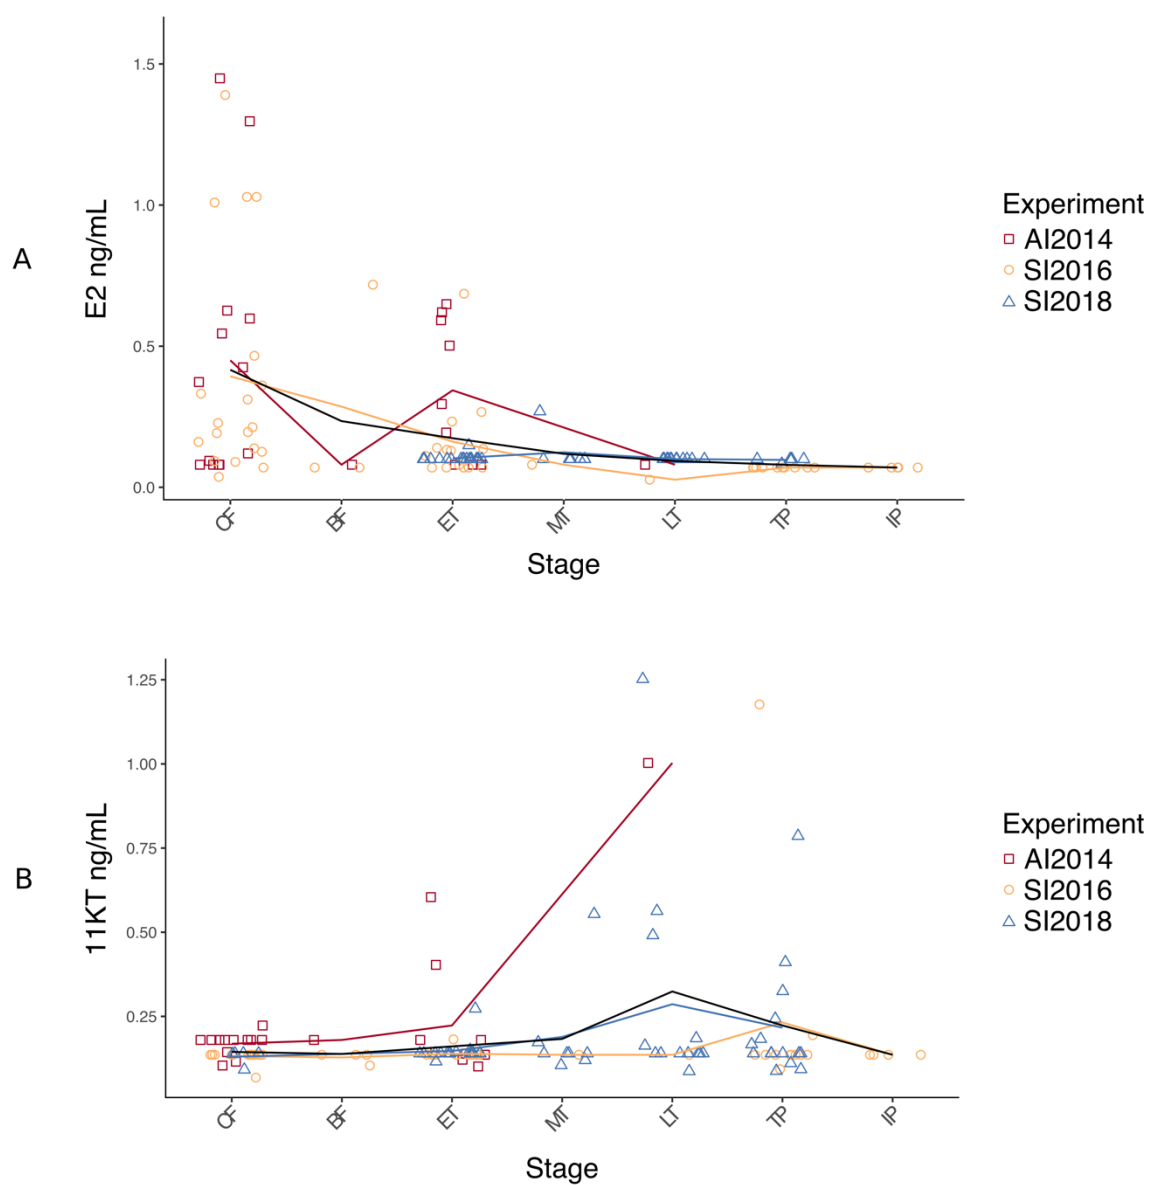

1346

1347

1348

1349

1350

1351

1352

1353

1354



1355 Figure 5:

1356

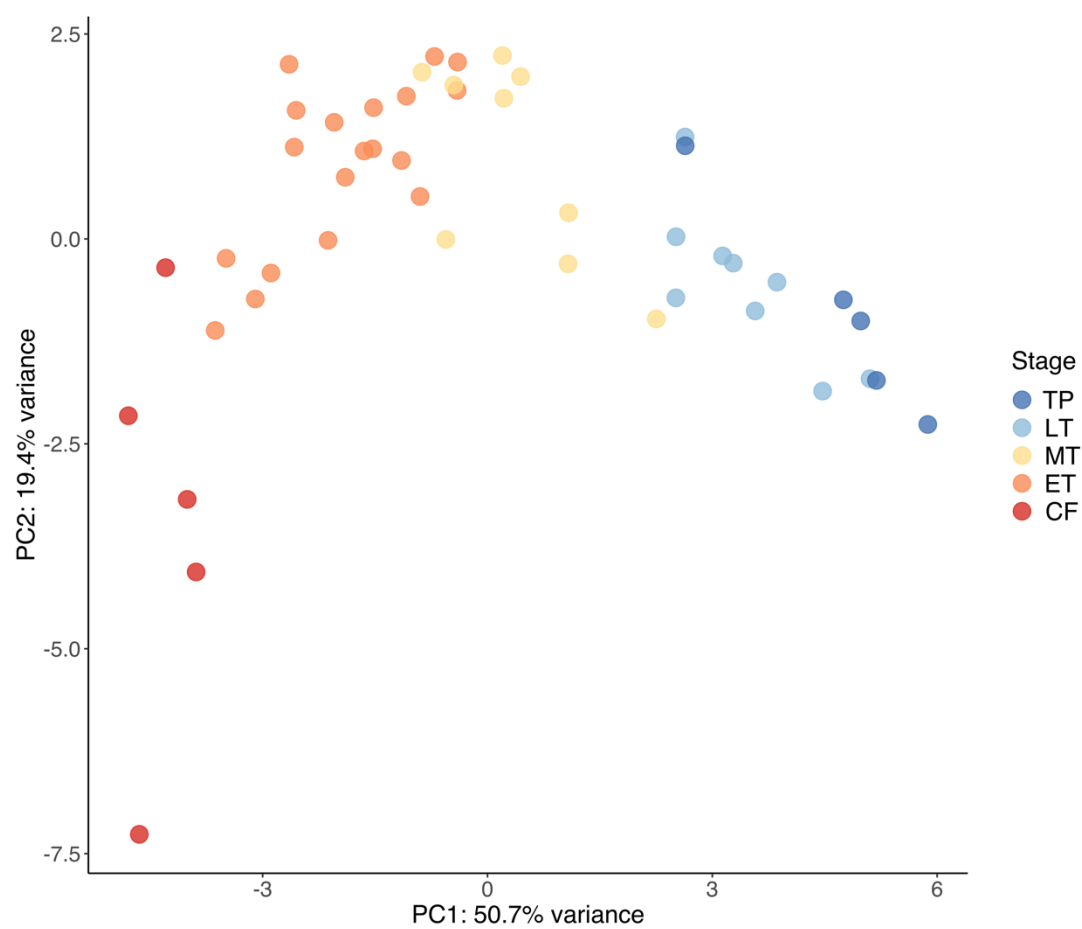

1357

1358

1359

1360

1361

1362

1363

1364

1365

1366

1367

1368

1369

1370 Figure 6:

1371

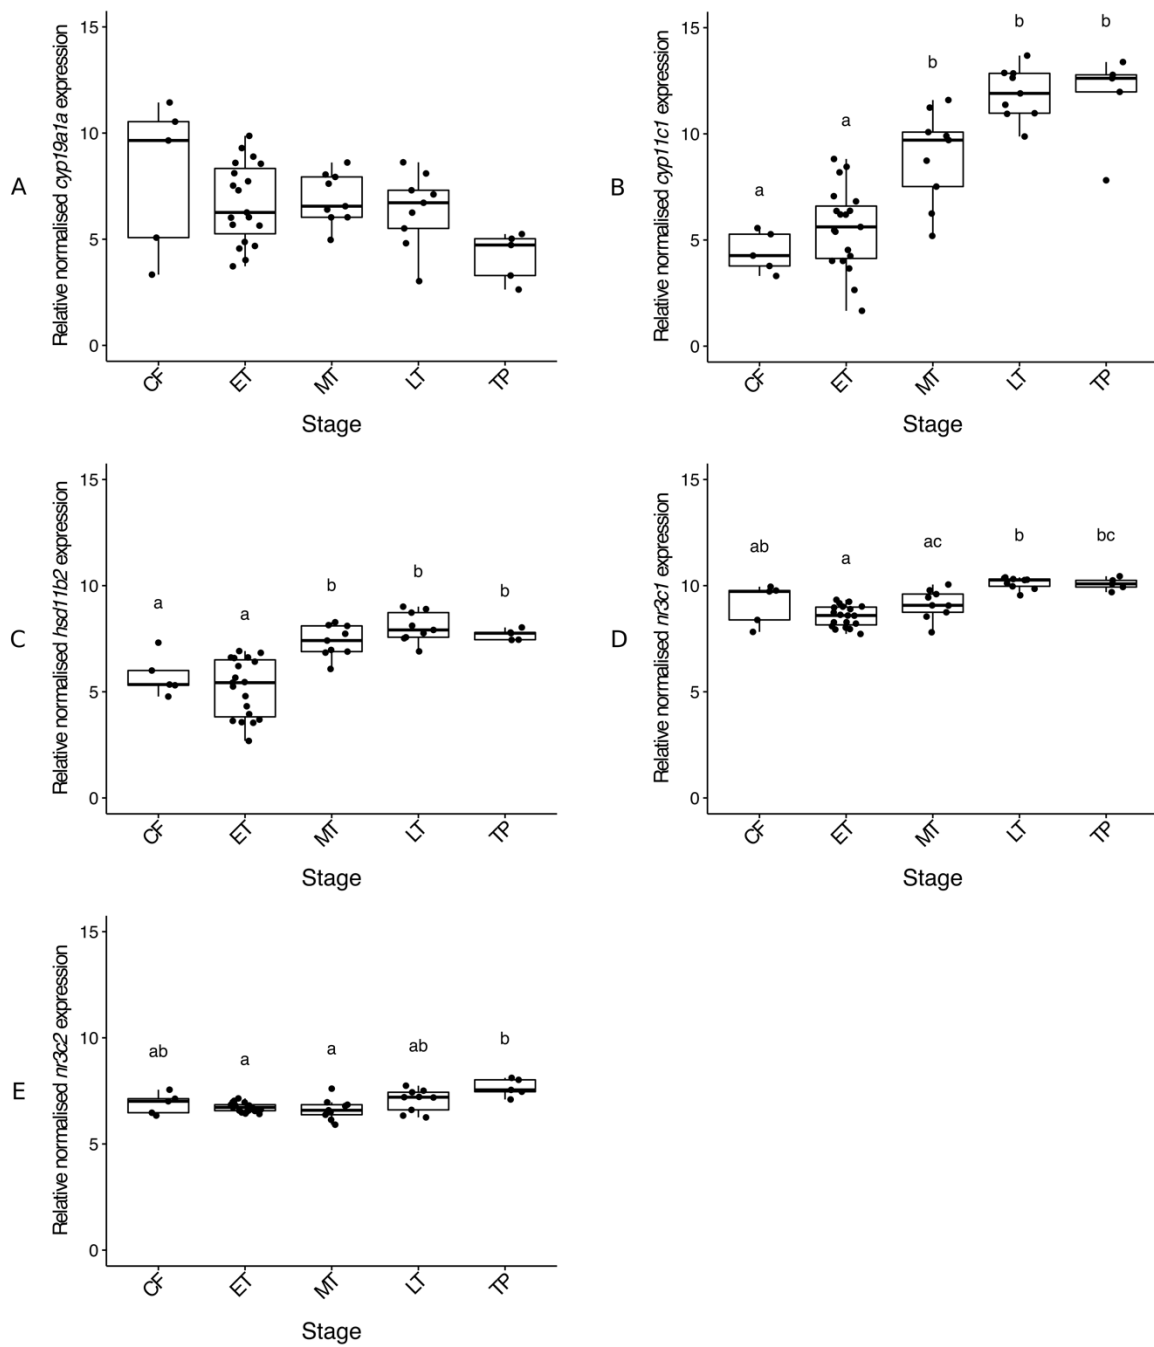

1372

1373

1374

1375

1376

1377

1378

1379 Figure 7:

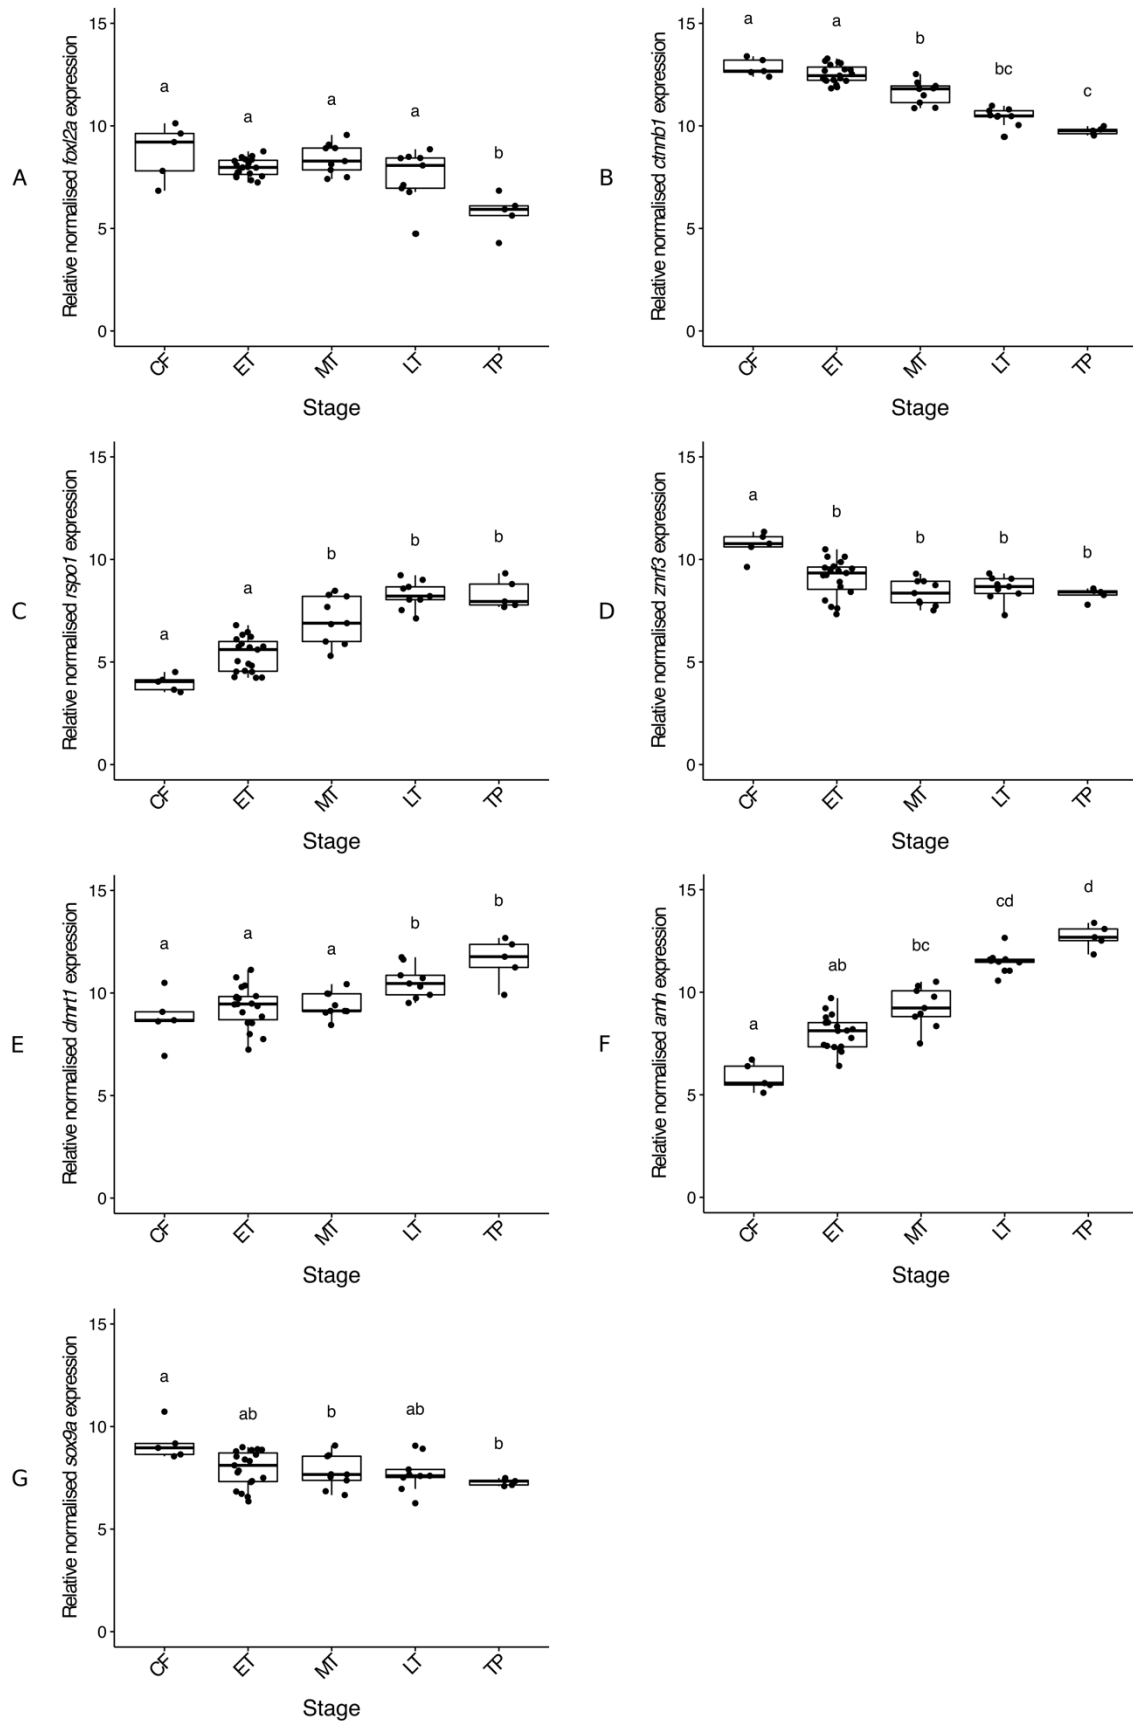

1380

1381 Figure 8:

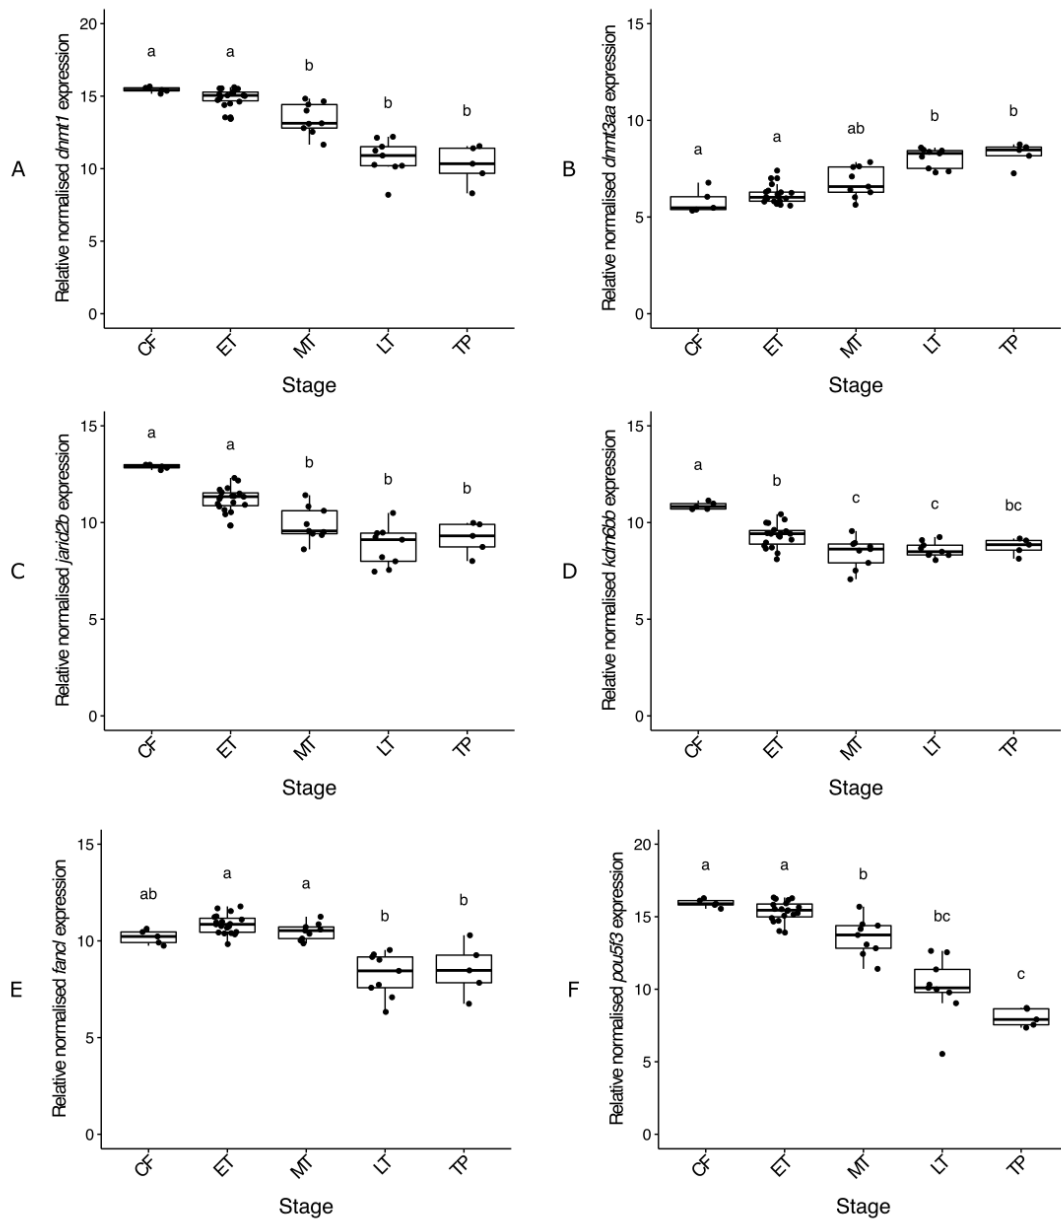

1382
